# 1 Dynamics of transcription induced by osmopress promoters revealed by 2 live single-cell assays

3 Victoria Wosika and Serge Pelet\*

4 Department of Fundamental Microbiology, University of Lausanne, 1015 Lausanne, Switzerland.

5

6 \*Correspondance : [serge.pelet@unil.ch](mailto:serge.pelet@unil.ch)

7

## 8 Abstract

9 Precise regulation of gene expression in response to environmental changes is crucial  
10 for cell survival, adaptation and proliferation. In eukaryotic cells, extracellular signal  
11 integration is often carried out by Mitogen-Activated Protein Kinases (MAPK), which  
12 control cell differentiation, apoptosis and stress response. Despite a robust MAPK  
13 signaling activity, downstream gene expression can display a great variability between  
14 single cells. We have used *Saccharomyces cerevisiae* to study the dynamics of  
15 transcription of stress-responsive genes. Following a hyper-osmotic shock, the MAPK  
16 Hog1 induces the transcription of hundreds of genes. Using a PP7 reporter assay, we  
17 have monitored with high temporal resolution and in single cells, the dynamics of  
18 transcription from a set of promoters in order to highlight how the onset, the level and  
19 the shutoff of transcription are regulated in this model MAPK pathway.

20

## 21 Keywords

22 MAPK signaling, HOG pathway, Transcription, Single-cell analysis, fluorescence  
23 microscopy, PP7 phage coat protein.

24

## 25 Introduction

26 A crucial function to all cellular life is the ability to sense the environment and adapt to  
27 its variations. These changes in the extracellular environment will induce specific  
28 cellular responses. These responses are orchestrated by signal transduction cascades  
29 which receive cues from plasma membrane sensors and turn this information into a  
30 biological response by inducing complex transcriptional programs implicating  
31 hundreds of genes<sup>1-3</sup>. Tight regulation of signaling is crucial to ensure the correct  
32 temporal modulation of gene transcription, which can otherwise alter the cell  
33 physiology<sup>4-6</sup>. Interestingly, single-cell analyses have revealed that genes regulated  
34 by an identical signaling activity can display a wide variability in their transcriptional  
35 responses<sup>7-10</sup>. This noise in transcriptional output questions how signal transduction  
36 can faithfully induce different loci and which molecular mechanisms contribute to this  
37 variability in gene expression.

38 In eukaryotic cells, various environmental stimuli are transduced by the highly  
39 conserved Mitogen-Activated Protein Kinases (MAPK) cascades<sup>11,12</sup>. In  
40 *Saccharomyces cerevisiae*, a sudden increase in the osmolarity of the medium is

41 sensed by the High Osmolarity Glycerol (HOG) pathway, which leads to the activation  
42 of the MAPK Hog1, a homolog of p38 in mammals<sup>13,14</sup>. Upon hyper-osmotic stress, the  
43 kinase activity of Hog1 drives an increase in the internal glycerol concentration allowing  
44 balancing of the internal and the external osmotic pressures, promoting the adaptation  
45 of the cells to their new environment. In parallel to its cytoplasmic activity, Hog1 also  
46 transiently accumulates into the cell nucleus to induce the expression of hundreds of  
47 osmostress-responsive genes (Figure 1A). The MAPK is recruited to promoter regions  
48 by Transcription Factors (TF) and, in turn, Hog1 recruits chromatin remodeling and  
49 modifying complexes, the Pre-Initiation Complex and the RNA Polymerase II (PolII) to  
50 trigger gene expression<sup>15,16</sup>. Once cells have adapted, Hog1 is inactivated and exits  
51 the cell nucleus, transcription stops and chromatin is rapidly reassembled at HOG-  
52 induced gene loci.

53 Biochemical analyses of this pathway have identified the key players implicated in the  
54 induction of gene expression and the central role played by the MAPK in all these  
55 steps<sup>15</sup>. In parallel, single-cell measurements have uncovered the large variability  
56 present in the expression of stress-responsive genes. In particular, translational  
57 reporters and RNA-FISH measurements have helped identify that slow chromatin  
58 remodeling at each locus is generating strong intrinsic noise in the gene expression of  
59 many stress-responsive genes<sup>9,17</sup>. In order to get deeper insights into the chromatin  
60 regulation of osmostress gene expression kinetics, we aimed at monitoring the  
61 dynamics of mRNA production of osmostress-responsive genes in live single cells.  
62 Since a decade, phage coat protein-based assays, like the MS2 or PP7 systems, have  
63 been used to visualize mRNA production in live single cells<sup>18,19</sup>. These experiments  
64 contributed to reveal the bursty nature of transcription, whereby a set of polymerases  
65 simultaneously transcribing a gene generates a burst in mRNA production, which is  
66 followed by a pause in transcription<sup>20-22</sup>.

67 In this study, we dissect the kinetics of transcription of osmostress genes. The  
68 production of mRNA was monitored using a fluorescent phage coat protein assay. This  
69 reporter allowed us to monitor with high temporal resolution and in a fully automated  
70 manner, the fluctuations in transcription arising in hundreds of live single cells. The  
71 analysis of the characteristic responses of multiple stress-responsive promoters  
72 allowed us to identify some general rules that govern the initiation, the level and the  
73 shutoff of the transcriptional process.

74

## 75 Results

76 High osmotic pressure is sensed and transduced in the budding yeast *Saccharomyces*  
77 *cerevisiae* via the HOG signaling cascade, which culminates in the activation of the  
78 MAPK Hog1 (Figure 1A). Upon activation, this key regulator accumulates in the  
79 nucleus to trigger gene expression in a stress level-dependent manner  
80 (Supplementary Fig 1A). The activity of the kinase can thus be monitored by following  
81 its own nuclear enrichment<sup>23,24</sup>. In parallel to Hog1, the general stress response  
82 pathway is induced by the hyper-osmotic shock and its main transcription factors  
83 Msn2/4 also relocate into the nucleus with dynamics highly similar to the ones  
84 observed for Hog1 (Supplementary Fig 1B and C)<sup>25,26</sup>. Nuclear Hog1 and Msn2/4 serve  
85 as triggers for osmostress genes expression with approximately 250 genes being up-

86 regulated by this stimulus<sup>1,27</sup>. The activity of the pathway, and thus gene expression,  
87 is limited to the cellular adaptation time which can be followed by monitoring Hog1  
88 nuclear exit or the recovery of the cell size (Supplementary Fig 1A and D). The fast  
89 and transient activity of the osmostress response as well as the homogenous activation  
90 of the MAPK within the population<sup>9,24</sup> make this signaling pathway an excellent model  
91 for understanding the induction of eukaryotic stress-responsive genes, which are often  
92 accompanied by important chromatin remodeling.

93

#### 94 *Monitoring osmostress gene transcription dynamics*

95 In order to quantify the production of mRNA in live single cells, we used the PP7 system  
96 to label mRNAs<sup>19</sup>. Briefly, constitutively expressed and fluorescently labeled PP7  
97 phage coat proteins associate to a binding partner: an mRNA-encoded array of twenty-  
98 four PP7 stem loops (PP7sl). In our settings, this reporter construct is integrated in the  
99 genome at the *GLT1* locus, downstream of a promoter of interest (Figure 1B)<sup>19</sup>, in a  
100 strain bearing a nuclear tag (Hta2-mCherry) and expressing a fluorescently tagged  
101 PP7 allele (PP7 $\Delta$ FG-GFPenvy<sup>28,29</sup> (PP7-GFP), Methods). Upon activation of the  
102 promoter, local accumulation of newly synthesized transcripts at the Transcription Site  
103 (TS) leads to the formation of a bright fluorescent focus due to the enrichment in PP7-  
104 GFP fluorescence above the background signal (Figure 1C and Supplementary Movie  
105 1). The fluorescence intensity at the TS is proportional to the number of mRNA being  
106 transcribed at this locus and thus to the instantaneous load of RNA polymerases. After  
107 termination, single mRNAs are exported out the nucleus and their fast diffusion in the  
108 cytoplasm prevents their detection under the selected illumination conditions  
109 (Methods).

110 Typically, time-lapse imaging with fifteen-second intervals for twenty-five minutes with  
111 six Z-planes for the PP7-GFP channel on four fields of view was performed (Methods).  
112 All microscopy acquisitions were performed as independent duplicate or triplicate  
113 experiments. Image segmentation and quantification were performed automatically,  
114 allowing to extract typically one hundred to three hundred single-cell traces for each  
115 experiment<sup>30</sup>. The mean intensity of the 20 brightest pixels in the nucleus from which  
116 the average cell fluorescence was subtracted, was used as a measurement of TS  
117 fluorescence and thus as proxy for transcriptional activity (Figure 1D and E, Methods).

118 Figure 1D displays the average TS fluorescence from at least 190 cells bearing the  
119 p*STL1*-PP7sl reporter following activation of the HOG pathway by various NaCl  
120 concentrations. The *STL1* promoter is one of the most studied HOG-induced  
121 promoters and displays strong intrinsic noise<sup>9,31–33</sup>. As expected, increasing salt  
122 concentration leads to an increasing transcriptional output from the cell population and  
123 no change in TS fluorescence is detected in the medium control. The dynamics  
124 observed are in agreement with control experiments performed with a dynamic protein  
125 expression reporter (dPSTR, Supplementary Fig 2A) and with previously published  
126 results<sup>33,34</sup>. Importantly, in a reporter strain where we combined the p*STL1*-PP7sl  
127 reporter and the Hog1-mCherry relocation assay, we observe an absence of  
128 correlation between the two assays (Supplementary Fig 3). Cells with similar Hog1  
129 relocation behaviors can display highly variable transcriptional outputs. Because we  
130 cannot infer the downstream PP7 response from the Hog1 activity pattern, we

131 concentrated our analysis on strains bearing only the PP7 reporter system, allowing to  
132 sample the TS dynamics with higher frequency and in more cells.

133 The hundreds of dynamic single-cell measurements acquired with the PP7sl reporter  
134 form a very rich dataset where multiple features can be extracted from each trace  
135 (Figure 1E, Methods). Our analysis allows to reliably quantify the appearance and  
136 disappearance (Start Time and End Time) of the TS (Supplementary Fig 4). The  
137 maximum intensity of the trace and the integral under the curve provide estimates of  
138 the transcriptional output from each promoter. In addition, we have identified  
139 transcriptional bursts when monitoring strong fluctuations in the TS intensity.

140

#### 141 *HOG genes are expressed with a variety of transcription dynamics*

142 In addition to p*STL1*, five other stress-responsive promoters, often used in the  
143 literature to report on HOG pathway transcriptional activity, were selected for this  
144 study<sup>32,35</sup>. Each strain differs only by the one thousand base pairs of the promoters  
145 present in front of the PP7sl (800bp for p*STL1*<sup>9,36</sup>); however, each strain displays a  
146 different transcriptional response following a 0.2M NaCl stimulus (Figure 2A). Because  
147 the level of accumulation of the PP7 signal at the transcription site and the timing of  
148 the appearance and disappearance of the TS is different for each tested promoter, it  
149 implies that the promoter sequence dictates multiple properties of the transcription  
150 dynamics. These dynamics are in line with control experiments performed with the  
151 dPSTR assay (Supplementary Fig 2B) and population-averaged responses published  
152 in the literature<sup>32,34</sup>.

153 Because the PP7 assay relies on the binding of free phage coat proteins, we generated  
154 strains expressing three times more phage-coat proteins and quantified the  
155 transcriptional response for the two promoters with the highest expression levels  
156 (p*GPD1* and p*HSP12*, Supplementary Fig 5). The single-cell parameters recovered  
157 between the overexpressed and our standard reporters are highly similar, denoting the  
158 absence of titration of the assay under our experimental conditions.

159 The automated analysis allows to identify the presence or absence of a transcription  
160 site in each single cell, and thus the fraction of cells that induce the promoter of interest  
161 (Figure 2B). Interestingly, even in absence of stimulus, some promoters display a basal  
162 level of transcription. In the p*GRE2*, p*HSP12* and p*GPD1* reporter strains, in 5 to 20%  
163 of the cells, an active transcription site can be detected in the few time points before  
164 the stimulus (Figure 2C, upper image and Supplementary Movie 2). If the period of  
165 observation is extended to a twenty-five-minute time lapse without stimulus, this  
166 fraction increases 2 to 3-fold (Supplementary Fig 6). Upon activation by 0.2M NaCl,  
167 the fraction of responding cells for the three promoters that display basal expression  
168 surpasses 85%, while for the three promoters without basal induction (p*ALD3*, p*CTT1*  
169 and p*STL1*), the fraction of responding cells remains below 65%. The partial activation  
170 of the HOG-responsive promoters in the cell population is in agreement with previous  
171 studies which observed a bimodal expression pattern in the hyper-osmotic stress  
172 response pathway<sup>9,17</sup>.

173 A key parameter controlled by the promoter sequence is the timing of induction. In  
174 Figure 2D, the time when cells become transcriptionally active (Start Time) is plotted  
175 as a Cumulative Distribution Function (CDF) only for the cells where a TS is detected

176 after the stimulus, thereby excluding basal expressing cells and non-responding cells.  
177 Treatment with 0.2M NaCl results in a sudden activation of transcription (Figure 2D).  
178 This contrasts with non-induced samples, where the CDF of the promoters displaying  
179 basal activity rises almost linearly, because cells stochastically activate transcription  
180 during the measurement window (Supplementary Fig 6C). Upon stress, the promoters  
181 displaying basal activity tend to be induced faster than the promoters that are  
182 repressed under log-phase growth, with p*GPD1* being activated the fastest (~1 min),  
183 while p*ALD3* and p*STL1* require more than 4 minutes for activation (Figure 2E).  
184 However, there is a great variability in transcription initiation between cells of the same  
185 population, since we observe 3 to 4 minutes delay between the 10<sup>th</sup> and 90<sup>th</sup>  
186 percentiles of the population, with the exception of p*GPD1* where the induction is more  
187 uniform, and less than 2 min delay is observed (Figure 2E). Comparison between  
188 individual replicates demonstrates the reliability of our measurement strategy. The 10<sup>th</sup>  
189 and 50<sup>th</sup> percentiles of Start Time for the promoters with a basal expression are  
190 significantly faster than at least two or all three of the promoters lacking basal  
191 expression.

192 Interestingly, we observe a correlation between faster transcriptional activation from  
193 p*GPD1*, p*HSP12* and p*GRE2* and the presence of basal expression level. Moreover,  
194 these promoters also display the higher number of responding cells upon a 0.2M NaCl  
195 shock. These results suggest that basal expression is associated with a more  
196 permissive chromatin state. Thus, promoters with basal activity display a lower  
197 transcriptional activation threshold, which leads to a faster activation and higher  
198 probability of being induced.

199 To test this hypothesis, we disrupted the function of the chromatin remodeling complex  
200 SAGA by deleting *GCN5*<sup>37</sup>, which led to fewer transcribing cells and slower induction  
201 of the p*STL1* reporter (Figure 2F). However, abolishing histone H2AZ variants  
202 exchange mainly at +1 and -1 nucleosomes by deleting *HTZ1*<sup>38,39</sup> results only in a  
203 reduction in the fraction of transcribing cells. Conversely, the chromatin state at the  
204 *STL1* promoter can be loosened by relieving the glucose repression when using  
205 raffinose as a C-source<sup>40</sup>. A fraction of the cells grown in these conditions displays  
206 basal expression from the p*STL1* reporter. Upon stimulation with 0.2M NaCl, the  
207 median Start Time is accelerated by 1 min in raffinose compared to glucose (Figure  
208 2G).

209 Together these results reinforce the idea that there is a close link between the  
210 chromatin state under log-phase growth and the ability to induce stress-responsive  
211 genes. A promoter that is tightly repressed will need more Hog1 activity and thus more  
212 time to become transcriptionally active, therefore displays a lower fraction of  
213 responding cells.

214

### 215 *Early Hog1 activity dictates transcriptional competence*

216 Surprisingly, the large majority of the measured Start Times fall within the first few  
217 minutes of Hog1 activity. The total period of Hog1 activity provides a temporal window  
218 where transcription can potentially be initiated. However, the switch to a  
219 transcriptionally active state takes place almost exclusively within the first few minutes  
220 after the stimulus. Figure 3A compares the characteristic timing of the Hog1 nuclear

221 enrichment behavior at three different NaCl concentrations (Supplementary Fig 7A) to  
222 the cumulative proportion of transcription induction for cells bearing the pSTL1  
223 reporter; 90% of the transcribing cells initiate transcription at the start of the osmotic  
224 stress response, while Hog1 nuclear accumulation is rising and before it drops below  
225 80% of its maximum (decay time). A similar behavior is observed for all the promoters  
226 tested whether they display basal activity or not (Figure 3B). For pALD3, which is the  
227 slowest promoter tested, 87% of the Start Times are detected before the decay of Hog1  
228 activity at 0.2M NaCl (7 min) while the full adaptation time of the HOG pathway takes  
229 14 min.

230 In parallel to this observation, the productivity of the transcriptional output decreases  
231 with the time after the stimulus. Cells that start transcribing the pSTL1 promoter early,  
232 display a larger integral over the PP7 signal and a higher maximum intensity compared  
233 to cells that initiate transcription later (Figure 3C and Supplementary Fig 7B). A similar  
234 behavior is quantified for all tested promoters, independently of the presence or  
235 absence of basal transcription (Supplementary Fig 7C and D). These measurements  
236 demonstrate that the high Hog1 nuclear activity present in the first minutes of the  
237 response is key to determine the transcriptional state and the overall output of a  
238 promoter. If a locus has not been activated within these first minutes, it remains silent,  
239 despite the sustained presence of the active MAPK in the nucleus. In addition, the later  
240 the promoter activation takes place, the lower the output of the transcription will be,  
241 consistent with the active role played by Hog1 in multiple steps of the transcription  
242 process, notably its recruitment and association with the elongation complex<sup>41</sup>.

243

#### 244 *Transcription factors control the dynamics and level of mRNA production*

245 We showed that chromatin state affects the probability and the dynamics of induction  
246 of osmostress gene promoters. We have also observed that the time at which a locus  
247 is activated influences the level of transcription arising from this locus. In order to  
248 assess the transcriptional level of each promoter, we use as a proxy the maximum of  
249 the PP7 trace of each single cell where a transcription event could be detected (Figure  
250 4A). This value represents the maximal loading of polymerase on the locus taking  
251 place during the period of transcription. Similar results are obtained when comparing  
252 the integral below the PP7 trace, which represents the total transcriptional output from  
253 a promoter (Supplementary Fig 8A). Each promoter has a different intrinsic capability  
254 of inducing a given level of transcription, which is independent of the fact that the  
255 promoter possesses a basal transcriptional level or a fast activation. Indeed, pGRE2  
256 displays the lowest level of induction among the tested promoters, despite the  
257 presence of basal transcription arising from this promoter and being the second-fastest  
258 promoter tested.

259 As expected, the ability to recruit RNA polymerases is dependent on HOG activity.  
260 Indeed, the three promoters with basal activity display a much higher transcriptional  
261 activity upon 0.2M NaCl stress than in normal growth conditions (Figure 4B and  
262 Supplementary Fig 8B). This can be easily rationalized by the fact that additional  
263 transcription factors come into play to transduce the stress response signal into a gene  
264 expression program (Figure 1A). Osmostress genes are governed by five transcription  
265 factors (Hot1, Sko1, Smp1, Msn1 and Msn2/4)<sup>35,42,43</sup> and generally display a  
266 combination of their binding sites on their promoter sequences (Supplementary Fig 9).

267 Based on studies of synthetic promoters it has been established that binding sites  
268 number and distance from the transcription start site (TSS) influence the promoter  
269 output<sup>44</sup>. Unfortunately, endogenous osmostress promoters display a wide diversity in  
270 number and affinity of TF binding sites. Therefore, no obvious prediction of the  
271 transcriptional activity for osmostress promoters can be drawn. For instance, eight  
272 sites can be mapped on p*ALD3* and nine on p*CTT1*; however, p*CTT1* displays a much  
273 weaker output than p*ALD3*.

274 To test the implication of transcription factors on the transcription dynamics, *HOT1* and  
275 *SKO1* genes were deleted in the p*STL1* and p*GPD1* reporter strains (Figure 4C). As  
276 expected, deletion of either TF leads to a slower activation and decreased  
277 transcriptional output for both promoters (Figure 4D and E). This is consistent with a  
278 synergistic effect of multiple TFs on a promoter for recruiting Hog1, which will in turn  
279 determine the RNA PolIII recruitment. For both promoters, deletion of *HOT1* has a  
280 stronger effect than *SKO1* deletion. For p*STL1*, the fraction of responding cells drops  
281 below 5% in the *hot1Δ* background (Figure 4F). For p*GPD1*, the fraction of responding  
282 cells remains higher than 90% for either TF deletions. Interestingly, more cells with  
283 basal expression were observed in the *sko1Δ* cells compared to the WT. This  
284 observation is in agreement with data showing that Sko1 is part of a repressor complex  
285 under log-phase growth and turned into an activator by Hog1 activity<sup>45</sup>. In addition,  
286 these results attest the key role played by the TF in controlling both the dynamics and  
287 level of transcription from these stress promoters.

288

### 289 *Multiple polymerase convoys transcribe stress-responsive genes*

290 In order to identify transcriptional bursts, we sought to identify strong fluctuations in  
291 each single-cell trace. Individual peaks, identified with the *findpeak* algorithm in Matlab,  
292 were filtered to retain only peaks separated by pronounced troughs (Methods). In 20  
293 to 30% of the traces, 2 or more peaks were identified (Figure 5A and B). The total  
294 length of the transcript downstream of the promoter is 8kb (1.5 for the stem loops + 6.5  
295 for the *GLT1* ORF). Based on a transcription speed of 20bp/s<sup>19</sup>, the expected lifetime  
296 of a transcript in the TS is 6.6 min. This corresponds well to the mean duration  
297 observed for the p*ALD3*, p*CTT1*, p*STL1* and p*GRE2* reporters (Figure 5C). However,  
298 it is very unlikely that the strong TS intensities recorded are generated by a single  
299 transcript, but rather by a group of PolIII that simultaneously transcribes the locus,  
300 probably forming convoys of polymerases<sup>46</sup>. Indeed, single mRNA FISH experiments  
301 have shown that following a 0.2M NaCl stress, the endogenous *STL1* locus produces  
302 on average 20 mRNAs per cell, but some cells can produce up to 100<sup>47</sup>.

303 For p*HSP12* and p*GPD1*, the average peak duration is longer than 11 min (Figure 5C),  
304 suggesting that multiple convoys of polymerases are traveling consecutively through  
305 the ORF. Unfortunately, the long half-life of the transcripts on the locus prevents a  
306 separation of individual groups of polymerases. However, when the traces where  
307 multiple peaks were identified are analyzed separately, the mean duration of the pulses  
308 becomes closer to the expected value of 6.6 min (Figure 5D). In addition, the output of  
309 the transcription estimated by the maximum intensity of the trace or the integral under  
310 the whole curve is equal or lower for traces with multiple pulses compared to traces  
311 where only a single peak is present (Figure 5E and Supplementary Fig 10). Together  
312 these data strengthen the notion that these stress-responsive promoters are highly

313 processive, displaying a high rate of transcription once activated. Multiple convoys of  
314 polymerases can be present on the transcribed locus. In some instances, the pause  
315 between two identified convoys is long enough for our assay to detect them and these  
316 cells tend to have a decreased transcriptional output. Conversely, traces where no  
317 pauses are detected tend to have a higher maximum loading of polymerases and  
318 higher mRNA production outputs, as quantified by the trace maximum intensity and  
319 the trace integral, which suggests a higher polymerase convoy loading frequency.

320

321 *Transcription shutoff is controlled by MAPK activity and promoter identity*

322 We have shown that transcription initiation is dictated by early Hog1 activity. Next, we  
323 wanted to assess what are the determinants of transcriptional termination and by  
324 extension, the duration of transcriptional activity. In the HOG pathway, the duration of  
325 transcription has been reported to be limited by the cellular adaptation time. Therefore,  
326 the duration of transcription is shorter after a 0.1M NaCl stress and longer after a 0.3M  
327 stress, compared to a 0.2M stress (Figure 6A). For the p*STL1* promoter, the last time  
328 point where we detect the PP7 signal at the TS (EndTime) matches the timing of  
329 nuclear exit of the MAPK Hog1 at all concentrations tested (Figure 6B).

330 In order to challenge this correlation between Hog1 activity and transcription arrest, we  
331 sought to modulate the MAPK activity pattern by controlling the cellular environment in  
332 a dynamic manner. Using a flow channel set-up, we generated a step, a pulse, or a  
333 ramp in NaCl concentration (Figure 6C, Methods). This experiment was performed in  
334 a strain carrying the p*STL1*-PP7sl reporter in conjunction with a Hog1-mCherry  
335 allowing to monitor the kinase activity and the downstream transcriptional response in  
336 the same cell. The step stimulus at 0.2M NaCl corresponds approximately to the  
337 experiments performed in wells where the concentration of the osmolyte is suddenly  
338 increased at time zero and then stays constant for the remaining of the experiments  
339 (Supplementary Movie 3). In the pulse assay, after 7 min at 0.2M, the NaCl  
340 concentration is set back to 0M (Supplementary Movie 4). Consequently, this shortens  
341 the MAPK activity of Hog1 which leaves the nucleus when cells are back in the normal  
342 growth medium. The ramp experiment starts with a pulse at 0.2M NaCl, then the  
343 concentration is slowly increased to 0.6M NaCl over the next 20 min (Supplementary  
344 Movie 5). This constant rise in external osmolarity extends the activity window of Hog1  
345 by preventing the adaptation of the cells. The transcriptional response from the *STL1*  
346 promoter follows generally the Hog1 activity pattern. Consequently, the PP7 signal is  
347 shortened in the pulse experiment and prolonged in the ramping conditions, compared  
348 to the step experiment (Figure 6C, lower panel).

349 The measured CDF of Start Time for the three different experimental conditions are  
350 identical up to the fifth minute (Figure 6D). In the pulse experiment, fewer cells become  
351 transcriptionally active because the MAPK activity stops early on. Conversely, the  
352 period of transcription activation is slightly extended in the ramp. However, even in this  
353 condition, we fail to activate transcription of the p*STL1* in all the cells. This is probably  
354 due to the fact that Hog1 activity is not maintained at its maximum for a sufficient time  
355 but drops progressively after 10 minutes (Figure 6C, middle panel). The End Times of  
356 transcription are clearly different for the three flow regimes, reflecting the activity  
357 windows provided by the MAPK in the different contexts (Figure 6E).



358 However, if we correlate the measured Hog1 adaptation time and the PP7 End Time  
359 in the same cell, the synchrony is only valid for the pulse experiment (Figure 6F). In  
360 the pulse, Hog1 activity drops when cells have initiated transcription. Removing the  
361 kinase from the nucleus has a direct impact on the transcriptional process which is  
362 halted within a few minutes after the end of the pulse. This experiment highlights the  
363 requirement for the active MAPK to be present throughout the transcriptional process.  
364 In the step and even more evidently in the ramp experiment, a global disconnection  
365 between Hog1 adaptation time and transcription End Time is observed. In the ramp  
366 conditions, in many cells, Hog1 has not adapted by the end of the time lapse, while  
367 transcription has already stopped much earlier. This observation indicates that an  
368 additional factor controls the transcriptional period which is linked to the ability to  
369 stochastically reinitiate multiple pulses of transcription after the initial strong pulse of  
370 signaling activity. A parameter which is essentially controlled by the promoter  
371 architecture of the gene.

372 In order to validate this observation, we quantified the duration of the transcriptional  
373 period in the six different promoters and plotted the cumulative distribution of End  
374 Times following a 0.2M NaCl stress (Figure 6G and H). Interestingly, despite the fact  
375 that all the adaptation times are similar for the different experiments, all six promoters  
376 display very different kinetics of inactivation, highlighting the contribution of the  
377 promoter identity on this parameter. Generally, promoters transcribed at a lower level  
378 (*pCTT1* and *pGRE2*) terminate transcription earlier. This shorter transcription window  
379 may reflect an inferior recruitment of activators of transcription on the promoter and  
380 thus allow for an earlier inhibition of transcription due to chromatin closure.

381 In addition, promoters possessing basal activity display an extended period of  
382 transcription after Hog1 adaptation time. For *pGPD1* and *pGRE2*, this results in a  
383 biphasic decay, where the first part of the decay corresponds to the arrest of Hog1-  
384 induced transcription and the second phase can be associated to the basal  
385 transcription arising from these promoters. Basal transcription may even be increased  
386 after the stress due to an elevated basal signaling activity of Hog1 in high osmotic  
387 conditions<sup>48</sup>.

388 For *pHSP12*, transcription persists beyond the adaptation time of the cells, with nearly  
389 30% of the cells that display an active TS at the end of the time lapse. This suggests  
390 that basal expression from this promoter is strongly increased post-stimulus. *pHSP12*  
391 possesses many Msn2/4 binding sites. Although the relocation dynamics of Hog1 and  
392 Msn2 are very similar during the adaptation phase, Msn2 displays some stochastic  
393 secondary pulses<sup>26</sup> not correlated to Hog1 relocation events (Supplementary Fig 1E  
394 and F) that could explain the stronger basal expression arising from this promoter post-  
395 adaptation.

396 Taken together, these measurements demonstrate that the MAPK activity pattern  
397 provides a temporal window where transcription can take place. When the signaling  
398 cascade is shut off, transcription ceases soon afterwards. However the promoter  
399 identity and probably its propensity to recruit positive activators will determine for how  
400 long the promoter can sustain an open chromatin environment favorable for  
401 transcription, while Hog1 activity decreases as cells adapt to their environment.

402

## 403 Discussion

404 In this study, we constructed PP7 reporter strains to monitor the transcription dynamics  
405 of osmostress promoters. Thanks to an automated analysis of time-lapse imaging  
406 datasets, highly dynamic measurements of mRNA production were extracted in  
407 hundreds of single cells. Osmotic shock is a transient stress which triggers the High  
408 Osmolarity Glycerol pathway. Glycerol accumulation shapes the cellular adaptation  
409 time and thus Hog1 activity window. In response to this signal, a large burst of mRNA  
410 arises from the stress promoters. This is typical of transmitted bursts, where the  
411 upstream signaling cascade or a regulatory network defines the period of  
412 transcriptional activity<sup>20</sup>. During this time, multiple convoys of polymerases transcribe  
413 the ORF. In many cases, these convoys are too closely spaced in time for our reporter  
414 to detect, however, when consecutive bursts can be identified, the overall  
415 transcriptional output is lower suggesting that a longer pause in transcription initiation  
416 has happened. In order to improve the identification of individual bursts, a shorter  
417 transcript could be placed after the PP7sl; however, it would decrease the brightness  
418 of the TS and thus the sensitivity of our assay.

419 We have observed that Hog1 activity can only induce transcription during the first  
420 minutes following the osmotic stress, corresponding to the phases when Hog1 nuclear  
421 enrichment increases and plateaus. A promoter that has not been induced during this  
422 time will remain inactive. MAPKs in general, and Hog1 in particular, have been shown  
423 to be tightly coupled to multiple steps of the transcription process<sup>41,49</sup>. Hog1 binds to  
424 the TF at the promoter, recruits the remodeling factors and acts as an elongation factor  
425 by associating with PolIII. During the first few minutes of the stress response, Hog1 is  
426 active at the promoter in order to evict nucleosomes; subsequently the kinase moves  
427 to the ORF region to sustain the open chromatin state and enable an efficient  
428 transcription<sup>33</sup>. The implication of the MAPK on the ORF probably limits its ability to  
429 activate new loci once the maximum nuclear enrichment has been reached. On the  
430 transcribed ORF, two opposing activities are taking place: on the one hand, Hog1  
431 promotes the transcription by sustaining an open chromatin environment. On the other  
432 hand, PolIII recruits negative regulators of transcription, such as Ino80 and Set1. Ino80  
433 is implicated in the redeposition of the nucleosome after the transcription<sup>50</sup>, while Set1  
434 methylates the nucleosome to deposit a repressive mark on the H3K4 residue<sup>39</sup>. The  
435 balance between these positive and negative regulators on the ORF can explain the  
436 relationship we observe between the Start Time and the transcriptional output.  
437 Because Hog1 activity decreases during the adaptation phase, the later an ORF  
438 becomes activated, the weaker, the Hog1 activity available to sustain its transcription.

439 The promoter architecture plays a major role in determining the transcriptional output  
440 from a gene. For stress-responsive genes, these sequences have to reach a balance  
441 between two contradictory requirements: repression during growth and fast activation  
442 upon stress. Among the six tested promoters, we find that three have a basal  
443 expression level leading to a low level of gene expression during normal growth and  
444 thus allowing rapid activation in the whole population. The three other promoters are  
445 strongly repressed during log-phase growth, however, upon stress, their activation is  
446 slower and even absent in 35–50% of the population. For each promoter, a trade-off  
447 has to be found between the level of repression under log-phase growth and the speed  
448 and variability in the gene expression upon stress. Interestingly, this status can be

449 modified by environmental cues since we have shown that by using an alternate  
450 carbon source, we can induce basal expression from the usually repressed *STL1*  
451 promoter and thus induce faster transcriptional activation upon osmotic shock.

452 In higher eukaryotes, the stress response MAPKs p38 and JNK relocate to the nucleus  
453 upon activation<sup>51,52</sup>. Immediate early genes, such as c-Fos or c-Jun, are induced within  
454 minutes after activation of MAPK cascades<sup>3,54</sup>. Interestingly, these loci display basal  
455 expression and require minimal chromatin modification for their induction<sup>53,55</sup>. In  
456 contrast, delayed primary response genes and secondary response genes require  
457 more profound chromatin remodeling to induce their activation<sup>54,56</sup>. These similarities  
458 between HOG transcriptional induction, where we identified two classes of promoters  
459 based on their basal level and dynamics of induction, suggest a high conservation in  
460 the mechanisms used by MAPK in all eukaryotes to regulate the dynamics of gene  
461 expression.

462

463

## 464 Acknowledgment

465 We thank the Pelet lab and Martin lab and for helpful discussions. Marta Schmitt,  
466 Gaëlle Spack, Joan Jordan and Clémence Varidel for technical assistance. David  
467 Shore and his lab for helpful discussions and reagents. Marie-Pierre Peli-Gulli and  
468 Claudio de Virgilio for plasmids, Tineke Lenstra for suggesting the PP7 $\Delta$ FG allele.  
469 Agathe Pelet for manual curation of microscopy images. Eulalia de Nadal, Mariona  
470 Nadal-Ribelles and Veneta Gerganova for critically reading the manuscript. Work in  
471 the Pelet lab is supported by SystemsX.ch (IPhD 51PHP0\_157354), the Swiss  
472 National Science Foundation (SNSF, PP00P3\_172900 and 31003A\_182431) and the  
473 University of Lausanne.

474

## 475 Author Contributions

476 VW and SP designed the experiments, analyzed the data and wrote the manuscript.  
477 SP performed the raffinose and the flow experiments. VW conducted all the other  
478 experiments.

479

## 480 Declaration of Interests

481 The authors declare no competing interests.

482

483

## 484 Material and Methods

### 485 *Plasmids and yeast strains*

486 All plasmids used in this study are listed in Supplementary Table 1. The PP7-GFP  
487 plasmid are based on the bright and photostable GFPenvy fluorescent protein<sup>29</sup>. The  
488 PP7 protein contains a truncation in the capsid assembly domain (PP7 $\Delta$ FG residues  
489 67–75: CSTSVCGE). Expression of the PP7 construct is controlled by a *pADH1*  
490 promoter and a *tCYC1* terminator. The final construct pVW284 is cloned in a single  
491 integration vector URA3 (pSIVu<sup>57</sup> Addgene #81089). The PP7 stem loops plasmids  
492 are based on the previously published p*POL1* 24xPP7*sl* integrative plasmid<sup>19</sup>  
493 (Addgene 35196). The stress responsive promoters replace the p*POL1* promoter in  
494 the original construct using 1 kbp (800 bp for p*STL1*) upstream of the ATG codon. The  
495 PP7 reporter plasmids are available on Addgene.

496 All strains were constructed in the W303 background and are listed in Supplementary  
497 Table 2. Transformations were performed with standard lithium-acetate protocols.  
498 Gene deletions and gene tagging were performed with either pFA6a cassettes<sup>58,59</sup> or  
499 pGT cassettes<sup>57</sup>. Transformants were selected with auxotrophy markers (Uracil,  
500 Histidine, Leucine and Tryptophan) and gene deletions were performed with antibiotic  
501 resistance to Nourseothricin (NAT), to a concentration of 100  $\mu$ g/ml. A fluorescently  
502 tagged histone strain was transformed with the PP7-GFP plasmid for integration in the  
503 *URA3* locus. Transformants were screened by microscopy for single integration. The  
504 selected strain was transformed with different osmostress promoters driving PP7*sl*  
505 plasmids linearized with a NotI digestion and integrated upstream of the *GLT1* ORF,  
506 as previously published<sup>19</sup>. Correct integration into the *GLT1* locus was screened by  
507 colony PCR with primers in the *GLT1* ORF (+600 bp) and in the *TEF* terminator of the  
508 selection marker on genomic DNA extraction. The integrity of the PP7 stem-loops array  
509 was assessed within the *TEF* terminator and in *GLT1* ORF (+250 bp) primers for all  
510 the promoters and deletions, after each transformation performed. For strains used in  
511 the study, at least two clones with correct genotypes were isolated and tested during  
512 a salt challenge time-lapse experiment. From the data analysis, the most frequent  
513 phenotype was isolated and the strain selected.

514

### 515 *Yeast culture*

516 Yeast cells were grown in YPD medium (YEP Broth: CCM0405, ForMedium) for  
517 transformation or in Synthetic Defined (SD) medium (YNB:CYN3801/CSM: DCS0521,  
518 ForMedium). For time-lapse experiments, cells were grown at least 24 hours in log-  
519 phase. A saturated overnight culture in SD medium was diluted into fresh SD-full  
520 medium to OD<sub>600</sub> 0.025 in the morning and grown for roughly 8 hours to reach OD<sub>600</sub>  
521 0.3-0.5. In the evening cultures were diluted by adding (0.5/OD<sub>600</sub>) $\mu$ l of cultures in 5ml  
522 SD-full for an overnight growth that kept cells in log-phase conditions. Cultures reached  
523 an OD<sub>600</sub> of 0.1-0.3 in the morning of the second day and further diluted if necessary  
524 to remain below an OD<sub>600</sub> of 0.4 during the day.

525 To prepare the samples for the microscopy experiments, these cells grown in log-  
526 phase for at least 24 hours were diluted to an OD<sub>600</sub> 0.05 and sonicated twice 1 min  
527 before placing 200  $\mu$ l of culture into the well of a 96-well glass bottom plate (MGB096-

528 1-2LG, Matrical Bioscience) previously coated with a filtered solution of Concanavalin  
529 A diluted to 0.5mg/ml in water (C2010, Sigma-Aldrich)<sup>60</sup>. Cells were let to settle for 30–  
530 45 minutes before imaging. Osmotic shock was performed under the microscope into  
531 the 96-well plate, by adding 100  $\mu$ l of a three times concentrated SD-full+NaCl stock  
532 solutions to the 200  $\mu$ l of medium already in the well, to reach the final desired salt  
533 concentration.

534

### 535 *Microscopy*

536 Images were acquired on a fully automated inverted epi-fluorescence microscope (Ti2-  
537 Eclipse, Nikon) placed by an incubation chamber set at 30 °C. Excitation was provided  
538 by a solid-state light source (SpectraX, Lumencor) and dedicated filter sets were used  
539 to excite and detect the proper fluorescence wavelengths with a sCMOS camera  
540 (Flash 4.0, Hamamatsu). A motorized XY-stage was used to acquire multiple filed of  
541 views in parallel and a piezo Z-stage (Nano-Z200, Mad City Labs) allowed fast Z-  
542 dimension scanning. Micro-manager was used to control the multidimensional  
543 acquisitions<sup>61</sup>.

544 Experiments with PP7sl were acquired with a 60X oil objective. For strains with PP7-  
545 GFP and Hta2-mCherry, GFP (40ms, 3% LED power) and RFP (20ms), along with two  
546 bright field images were recorded every 15 seconds for the GFP and every minute for  
547 the other channels, for a total duration of 25 minutes. Six z-stacks were performed on  
548 the GFP channels covering  $\pm 1.2 \mu$ m from the central plane with 0.4  $\mu$ m steps. An  
549 average bleaching of 32% for the GFP and 26% for the RFP for the whole time-lapse  
550 was quantified, in a strain without the PP7 stem loops, to avoid artifacts from the  
551 appearance of bright fluorescent foci. For all time-lapse experiments, media addition  
552 was performed before time point 4, defined as time zero.

553

### 554 *Data analysis*

555 Time-lapse movies were analyzed in an automated way: cell segmentation, tracking  
556 and feature measurements were performed by the YeastQuant platform<sup>30</sup>. All PP7  
557 experiments were realized in at least two or three fully independent replicate  
558 experiments. A representative experiment was selected for each strain and inducing  
559 conditions, based on cell size and cell adaptation dynamics. The replicates which did  
560 not pass one of these controls were discarded from the replicate analyses. Individual  
561 single cell traces were filtered based on cell shape and GFP intensity to remove  
562 segmentation errors or other experimental artifacts. In addition, cells in mitosis were  
563 removed from the analysis with a 0.95 filter on the nuclei eccentricity, to remove  
564 artifacts from locus and PP7 signal duplication.

565 The Hta2 signal combined with the two bright field images allowed to define the nucleus  
566 and cell borders. The GFP z-stacks were converted by a maximum intensity projection  
567 in a single image that was used for quantification. In order to avoid improper  
568 quantification of transcription sites at the nuclear periphery, the Nucleus object defined  
569 by the histone fluorescence was expanded by 5 pixels within the Cell object to define  
570 the ExpNucl object. The transcription site intensity was quantified by the difference  
571 between the mean intensity of the 20 brightest pixels in the ExpNucl (HiPix) and the  
572 average intensity from the same region. This provides a continuous trace which is

573 close to zero in absence of TS and increases by up to few hundred counts when a TS  
574 is present. To identify the presence of a transcription site, a second feature named  
575 ConnectedHiPix was used (Supplementary Fig 4A). Starting from the 20 HiPix a  
576 morphological opening of the image was performed to remove isolated pixels and  
577 retaining only the ones that clustered together which correspond to the transcription  
578 site. The ConnectedHiPix value was set to the mean intensity of the pixel present in  
579 the largest object remaining after the morphological operation. If no pixel remained  
580 after the morphological operation, the ConnectedHiPix was set to NaN. In each single  
581 cell trace, ConnectedHiPix values only detected for a single time point were removed.  
582 After this filtering, the first and last time points where a ConnectedHiPix was measured  
583 were defined as transcription initiation (Start Time) and termination times (End Time)  
584 respectively. Manual curation of Start and End Times from raw microscopy images  
585 was performed to validate this transcription site detection strategy (Supplementary Fig  
586 4B and C). In order to detect individual transcriptional bursts in the HiPix traces, the  
587 *findpeak* algorithm was used to identify all the peaks in the trace larger than a threshold  
588 of 7 counts within the Start and End Times. Following this first process, a set of  
589 conditions were defined to retain only the more reliable fluctuations: the drop following  
590 the peak has to be larger the fourth of the peak intensity; the intensity of the following  
591 peak has to rise by more than a third of the value at the trough. In addition, the value  
592 of the peak has to be at least one fifth of the maximum intensity of the trace in order to  
593 remove small intensity fluctuations being considered as peaks.

#### 594 *Raffinose experiment*

595 For the experiments comparing pSTL1-PP7sl induction in glucose versus raffinose,  
596 cells were grown overnight to saturation in SD-full medium. The cultures were diluted  
597 to OD 0.025 (Glucose) or 0.05 (Raffinose) and grown at 30° for at least four hours. In  
598 the raffinose medium, the expression level of the PP7-GFP was 2-fold lower than in  
599 glucose. Because of this low fluorescence intensity, cells were imaged with a 40X  
600 objective, and a single Z plane was acquired. Manual curation of the images was  
601 performed to define the Start Time in more than 250 cells. This experiment was  
602 performed in duplicate.

#### 603 *Flow chamber experiment*

604 The flow experiments were performed in Ibidi chambers ( $\mu$ -Slide VI 0.4, Ibidi). Two  
605 50ml Falcon tube reservoirs containing SD-full + 0.5  $\mu$ g/ml fluorescein-dextran (D3305,  
606 ThermoFischer) and SD-full + 0.6 M NaCl were put under a pressure of 30mbar  
607 (FlowEZ, Fluigent). The media coming from each reservoir were connected using FEP  
608 tubing (1/16" OD x 0.020" ID, Fluigent) to a 3-way valve (2-switch, Fluigent). The  
609 concentration of NaCl in the medium was controlled using a Pulse-Width Modulation  
610 strategy<sup>62,63</sup>. Periods of 4 seconds were used and within this time, the valve controlled  
611 the fraction of time when SD-full versus SD-full + NaCl was flowing. TTL signals  
612 generated by an Arduino Uno board and dedicated scripts were used to control  
613 precisely the switching of the valve. The fluorescein present in the SD-full medium  
614 quantified outside the Cell object provided an estimate of the NaCl concentration in the  
615 medium. Some strong fluctuations in this signal were probably generated by dust  
616 particles in the imaging oil or FLSN-dextran aggregates in the flow chamber. Following  
617 24hrs log-phase growth, cells bearing the pSTL1-PP7sl reporter, Hog1-mCherry and  
618 Hta2-tdiRFP tags were diluted to OD 0.2, briefly sonicated and loaded in an ibidi

619 channel previously coated by Concanavalin A. Cells were left to settle in the channel  
620 for 10 minutes before SD-full flow was started.

621

## 622 Figure Legends

### 623 **Figure 1. Quantifying transcription in the HOG pathway.**

624 **A.** Schematics of the transcriptional response induced by the MAPK Hog1 upon  
625 osmotic stress. Under normal growth conditions, the genomic locus is repressed by  
626 histones set in place by the Ino80 complex and Asf1/Rtt109. In addition, H3K4  
627 methylated histone mediated by Set1 contributes to the repression of the locus (upper  
628 panel). When Hog1 is active (lower panel), it accumulates in the nucleus with the  
629 transcription factors Msn2/4. Hog1 binds to transcription factors Hot1 and Sko1,  
630 allowing the remodeling of the chromatin by Rpd3 and the SAGA complex. The  
631 polymerase can be recruited to the locus and the RSC and SWR complexes will evict  
632 nucleosomes on the ORF. **B.** Construction of the transcriptional reporter. The promoter  
633 of interest (pPROM) is cloned in front of 24 stem loops. This construct is transformed  
634 into yeast and integrates in the *GLT1* locus replacing the endogenous promoter. Upon  
635 induction of the promoter, the mRNA stem loops are transcribed and recognized by  
636 the fluorescently tagged PP7 phage coat protein. **C.** Maximum intensity projections of  
637 Z-stacks of microscopy images from the p*STL1*-PP7sl reporter system in a 0.2M NaCl  
638 osmotic stress time-lapse experiment. The appearance of bright foci (arrow heads) in  
639 the nucleus of the cells denotes the active transcription arising from the promoter.  
640 Scale bar 5  $\mu$ m. **D.** Dynamics of the p*STL1*-PP7sl transcription site intensity (20  
641 brightest pixels in the average fluorescence of the nucleus) following hyperosmotic  
642 stress. The mean from 200 to 400 cells is represented by the solid line. The shaded  
643 areas represent the SEM. **E.** Analysis of one representative single cell trace. The raw  
644 trace is smoothed with a moving average and normalized by subtracting the intensity  
645 of the first time point after the stimulus. Multiple quantitative values can be extracted  
646 from this trace.

### 647 **Figure 2. Correlation between basal activity and transcription induction time.**

648 **A.** Dynamics of the transcription site intensity from six different promoters following a  
649 0.2M NaCl stress. The mean of at least 140 cells is represented by the solid line. The  
650 shaded areas represent the SEM. **B.** Percentage of cells where a PP7 TS site was  
651 detected. The light shaded area represents the percentage of PP7 positive cells before  
652 the stimulus was added (basal transcription). **C.** The microscopy thumbnails display  
653 cells bearing the p*GPD1*-PP7sl reporter system where transcription sites (arrow  
654 heads) can be detected before and after the stress of 0.2M NaCl. Scale bar 5  $\mu$ m. **D.**  
655 Cumulative distribution function (CDF) of the Start Time for each promoter only for the  
656 cells that induce transcription after time zero. **E.** 10<sup>th</sup>, 50<sup>th</sup> and 90<sup>th</sup> percentiles of the  
657 Start Times shown for the two to three replicates measured for each promoter. The  
658 number of stars next to each measurement corresponds to the number of promoters  
659 without basal level that are significantly different from the promoter with basal level  
660 (two-sample t-test,  $p < 0.05$ ). **F.** Cumulative distribution function of Start Times for the  
661 p*STL1*-PP7sl strain of wildtype, *htz1* $\Delta$  of *gcn5* $\Delta$  background. The inset shows the  
662 percentage of PP7 positive cells in each background. **G.** Cumulative distribution  
663 function of Start Times for the p*STL1*-PP7sl strain grown in glucose or raffinose. The

664 inset shows the percentage of PP7 positive cells, the light blue bar the basal positive  
665 PP7 cells.

### 666 **Figure 3. Relationship between Start Time and Hog1 relocation dynamics.**

667 **A.** In single cell Hog1 nuclear relocation traces, the timing of Hog1 nuclear entry (■),  
668 maximum enrichment (●), start of the decay in nuclear enrichment (◆) and Hog1  
669 adaptation (▲) can be identified (upper panel). The median (marker) and 25<sup>th</sup> to 75<sup>th</sup>  
670 percentiles (lines) for these measurements are plotted for three different osmotic  
671 stresses (central panel). The cumulative distribution function of Start Times for the  
672 p*STL1*-PP7sl reporter for these same three concentrations is plotted (lower panel). **B.**  
673 Histogram of Start Times following a 0.2M stress for the five other promoters tested.  
674 The vertical dashed line represents the median decay time of Hog1 measured at 0.2M.  
675 The number in the legend indicates the percentage of cells which have initiated  
676 transcription before the median Hog1 decay time. **C.** The population of p*STL1*-PP7sl  
677 positive cells is split in four quartiles based on their Start Time. The median (●) and  
678 25<sup>th</sup> to 75<sup>th</sup> percentiles (line) of the integral of the PP7 trace is plotted for each quartile.

### 679 **Figure 4. Intensity of transcription in transcription factor deletions**

680 **A.** Violin plot of the trace intensity (maximum of the TS during the transcription period)  
681 for the six promoters after stimulation by 0.2M NaCl. Each dot represents the value  
682 calculated from a single cell. The solid line is the median and the dashed line the mean  
683 of the population. **B.** Comparison between the trace intensity in stimulated (0.2M NaCl)  
684 and unstimulated conditions (0.0M) for the three promoters displaying basal  
685 expression. **C. — F.** Effect of the deletions of the HOT1 and SKO1 transcription factor  
686 genes on the dynamics of transcription (C), cumulative distribution of Start Times (D),  
687 the trace intensity (E) and the percentage of responding cells for the p*STL1*-PP7sl and  
688 p*GPD1*-PP7sl reporter strains following a 0.2M NaCl stress for at least 200 cells. For  
689 the p*STL1*-PP7sl *hot1*Δ sample, 349 cells were analyzed with only 9 displaying a PP7  
690 positive signal. This low number does not allow to draw a meaningful CDF curve in  
691 panel D.

### 692 **Figure 5. Analysis of transcription bursts.**

693 **A.** Percentage of cells where 1, 2 or 3 and more peaks are identified among the  
694 population of responding cells for the different promoters following a 0.2M NaCl stress.  
695 **B.** Examples of single cell traces displaying 1 or 2 peaks for the p*STL1*-PP7sl and the  
696 p*GPD1*-PP7sl reporter strains. **C.** Violin plot representing the Peak Duration. Each dot  
697 represents the value calculated for a single peak. The solid line is the median and the  
698 dashed line the mean of all the peaks measured. **D. - E.** The population of cells was  
699 split between cells displaying one peak and two or more peaks. The Peak Duration (D)  
700 and Trace Intensity (E) are plotted for the p*HSP12*-PP7sl and p*GPD1*-PP7sl strains.  
701 Each dot represents the value calculated for a single peak (D) or a single cell (E). The  
702 solid line is the median and the dashed line the mean of the population.

### 703 **Figure 6. Hog1 activity and promoter identity control the shutoff of transcription**

704 **A.** Violin plot representing the Transcription Period (time difference between End Time  
705 and Start Time) measured for the p*STL1*-PP7sl reporter following 0.1, 0.2 and 0.3M  
706 NaCl stresses. Each dot represents the value calculated from a single cell. The solid  
707 line is the median and the dashed line the mean of the population. **B.** One minus the  
708 cumulative distribution function of End Times for the p*STL1*-PP7sl reporter. The



709 vertical dashed lines represent the median adaptation time of Hog1 for the three  
710 different stress levels. **C.** Dynamics of the estimated NaCl concentration in the medium  
711 for the pulse, step and ramp experiment protocols (upper panel, Methods).  
712 Corresponding Hog1 relocation dynamics (middle panel) and pSTL1-PP7sl  
713 transcription site intensity (lower panel). The mean of at least 180 cells is represented  
714 by the solid line. The shaded areas represent the SEM. **D.** Cumulative distribution  
715 function (CDF) of the Start Time for all cells in the pulse, step and ramp experiments.  
716 The CDF at 15 min represents the fraction of responding cells for each condition. **E.**  
717 One minus the cumulative distribution function of End Times only for the responding  
718 cells in the pulse, step and ramp experiments. **F.** Correlation between the Hog1  
719 adaptation time and the PP7 End Time measured in the same cells in the pulse, step  
720 and ramp experiments. The open markers indicate cells where Hog1 has not adapted  
721 at the end of the time lapse. Adaptation time is arbitrarily set to 35 min for this sub-  
722 population. **G.** Violin plot representing the Transcription Period measured for the six  
723 different promoters following a 0.2 NaCl stress. Each dot represents the value  
724 calculated from a single cell. The solid line is the median and the dashed line the mean  
725 of the population. **H.** One minus the cumulative distribution function of End Times for  
726 the different promoters. The vertical dashed line represents the median adaptation time  
727 of Hog1 at 0.2M NaCl.

728

## 729 Reference

- 730 1. Gasch, A. P. *et al.* Genomic expression programs in the response of yeast cells to environmental  
731 changes. *Mol Biol Cell* **11**, 4241–4257 (2000).
- 732 2. Roberts, C. J. *et al.* Signaling and circuitry of multiple MAPK pathways revealed by a matrix of global  
733 gene expression profiles. *Science* **287**, 873–880 (2000).
- 734 3. Ferreiro, I. *et al.* Whole genome analysis of p38 SAPK-mediated gene expression upon stress. *BMC*  
735 *Genomics* **11**, 144 (2010).
- 736 4. Berry, D. B. & Gasch, A. P. Stress-activated genomic expression changes serve a preparative role  
737 for impending stress in yeast. *Mol Biol Cell* **19**, 4580–4587 (2008).
- 738 5. Chen, R. E., Patterson, J. C., Goupil, L. S. & Thorner, J. Dynamic localization of Fus3 mitogen-  
739 activated protein kinase is necessary to evoke appropriate responses and avoid cytotoxic effects.  
740 *Mol Cell Biol* **30**, 4293–4307 (2010).
- 741 6. Formstecher, E. *et al.* PEA-15 Mediates Cytoplasmic Sequestration of ERK MAP Kinase.  
742 *Developmental Cell* **1**, 239–250 (2001).
- 743 7. Raser, J. M. & O’Shea, Erin K. Control of stochasticity in eukaryotic gene expression. *Science* **304**,  
744 1811–1814 (2004).
- 745 8. Colman-Lerner, A. *et al.* Regulated cell-to-cell variation in a cell-fate decision system. *Nature* **437**,  
746 699–706 (2005).
- 747 9. Pelet, S. *et al.* Transient activation of the HOG MAPK pathway regulates bimodal gene expression.  
748 *Science* **332**, 732–735 (2011).
- 749 10. Corrigan, A. M. & Chubb, J. R. Regulation of Transcriptional Bursting by a Naturally Oscillating  
750 Signal. *Current Biology* **24**, 205–211 (2014).
- 751 11. Roux, P. P. & Blenis, J. ERK and p38 MAPK-Activated Protein Kinases: a Family of Protein Kinases  
752 with Diverse Biological Functions. *Microbiology and Molecular Biology Reviews* **68**, 320–344  
753 (2004).
- 754 12. Chen, R. E. & Thorner, J. Function and regulation in MAPK signaling pathways: lessons learned  
755 from the yeast *Saccharomyces cerevisiae*. *Biochim Biophys Acta* **1773**, 1311–1340 (2007).
- 756 13. Saito, H. & Posas, F. Response to hyperosmotic stress. *Genetics* **192**, 289–318 (2012).
- 757 14. Hohmann, S., Krantz, M. & Nordlander, B. Yeast osmoregulation. *Meth Enzymol* **428**, 29–45 (2007).
- 758 15. de Nadal, E. & Posas, F. Multilayered control of gene expression by stress-activated protein  
759 kinases. *EMBO J* **29**, 4–13 (2010).

- 760 16. de Nadal, E., Ammerer, G. & Posas, F. Controlling gene expression in response to stress. *Nat Rev*  
761 *Genet* **12**, 833–845 (2011).
- 762 17. Neuert, G. *et al.* Systematic Identification of Signal-Activated Stochastic Gene Regulation. *Science*  
763 **339**, 584–587 (2013).
- 764 18. Bertrand, E. *et al.* Localization of ASH1 mRNA particles in living yeast. *Mol Cell* **2**, 437–445 (1998).
- 765 19. Larson, D. R., Zenklusen, D., Wu, B., Chao, J. A. & Singer, R. H. Real-Time Observation of  
766 Transcription Initiation and Elongation on an Endogenous Yeast Gene. *Science* **332**, 475–478  
767 (2011).
- 768 20. Lionnet, T. & Singer, R. H. Transcription goes digital. *EMBO Rep* **13**, 313–321 (2012).
- 769 21. Fritzsche, C. *et al.* Estrogen-dependent control and cell-to-cell variability of transcriptional bursting.  
770 *Molecular Systems Biology* **14**, e7678 (2018).
- 771 22. Zoller, B., Little, S. C. & Gregor, T. Diverse Spatial Expression Patterns Emerge from Unified  
772 Kinetics of Transcriptional Bursting. *Cell* **175**, 835–847.e25 (2018).
- 773 23. Reiser, V., Ruis, H. & Ammerer, G. Kinase activity-dependent nuclear export opposes stress-  
774 induced nuclear accumulation and retention of Hog1 mitogen-activated protein kinase in the  
775 budding yeast *Saccharomyces cerevisiae*. *Mol Biol Cell* **10**, 1147–1161 (1999).
- 776 24. Muzzey, D., Gómez-Urbe, C. A., Mettetal, J. T. & van Oudenaarden, A. A systems-level analysis  
777 of perfect adaptation in yeast osmoregulation. *Cell* **138**, 160–171 (2009).
- 778 25. Görner, W. *et al.* Nuclear localization of the C2H2 zinc finger protein Msn2p is regulated by stress  
779 and protein kinase A activity. *Genes Dev.* **12**, 586–597 (1998).
- 780 26. Hao, N. & O’Shea, E. K. Signal-dependent dynamics of transcription factor translocation controls  
781 gene expression. *Nature Structural & Molecular Biology* **19**, 31–39 (2012).
- 782 27. O’Rourke, S. M. & Herskowitz, I. Unique and Redundant Roles for HOG MAPK Pathway  
783 Components as Revealed by Whole-Genome Expression Analysis. *MBoC* **15**, 532–542 (2003).
- 784 28. Chao, J. A., Patskovsky, Y., Almo, S. C. & Singer, R. H. Structural basis for the coevolution of a  
785 viral RNA–protein complex. *Nature Publishing Group* **15**, 103–105 (2007).
- 786 29. Slubowski, C. J., Funk, A. D., Roesner, J. M., Paulissen, S. M. & Huang, L. S. Plasmids for C-  
787 terminal tagging in *Saccharomyces cerevisiae* that contain improved GFP proteins, Envy and Ivy.  
788 *Yeast* **32**, 379–387 (2015).
- 789 30. Pelet, S., Dechant, R., Lee, S. S., van Drogen, F. & Peter, M. An integrated image analysis platform  
790 to quantify signal transduction in single cells. *Integrative biology: quantitative biosciences from nano*  
791 *to macro* **4**, 1274–1282 (2012).
- 792 31. Munsky, B., Neuert, G. & van Oudenaarden, A. Using Gene Expression Noise to Understand Gene  
793 Regulation. *Science* **336**, 183–187 (2012).
- 794 32. de Nadal, E. *et al.* The MAPK Hog1 recruits Rpd3 histone deacetylase to activate osmoreponsive  
795 genes. *Nature* **427**, 370–374 (2004).
- 796 33. Mas, G. *et al.* Recruitment of a chromatin remodelling complex by the Hog1 MAP kinase to stress  
797 genes. *EMBO J* **28**, 326–336 (2009).
- 798 34. Aymoz, D., Wosika, V., Durandau, E. & Pelet, S. Real-time quantification of protein expression at  
799 the single-cell level via dynamic protein synthesis translocation reporters. *Nature Communications*  
800 **7**, 11304 (2016).
- 801 35. Rep, M. *et al.* Osmotic stress-induced gene expression in *Saccharomyces cerevisiae* requires  
802 Msn1p and the novel nuclear factor Hot1p. *Mol Cell Biol* **19**, 5474–5485 (1999).
- 803 36. Alepuz, P. M., de Nadal, E., Zapater, M., Ammerer, G. & Posas, F. Osmostress-induced  
804 transcription by Hot1 depends on a Hog1-mediated recruitment of the RNA Pol II. *EMBO J* **22**,  
805 2433–2442 (2003).
- 806 37. Zapater, M., Sohrmann, M., Peter, M., Posas, F. & de Nadal, E. Selective requirement for SAGA in  
807 Hog1-mediated gene expression depending on the severity of the external osmotic stress conditions.  
808 *Mol Cell Biol* **27**, 3900–3910 (2007).
- 809 38. Wan, Y. *et al.* Role of the histone variant H2A.Z/Htz1p in TBP recruitment, chromatin dynamics,  
810 and regulated expression of oleate-responsive genes. *Mol Cell Biol* **29**, 2346–2358 (2009).
- 811 39. Nadal-Ribelles, M. *et al.* H3K4 monomethylation dictates nucleosome dynamics and chromatin  
812 remodeling at stress-responsive genes. *Nucleic Acids Research* **43**, 4937–4949 (2015).
- 813 40. Ferreira, C. & Lucas, C. Glucose repression over *Saccharomyces cerevisiae* glycerol/H<sup>+</sup> symporter  
814 gene STL1 is overcome by high temperature. *FEBS Lett* **581**, 1923–1927 (2007).
- 815 41. Proft, M. *et al.* The stress-activated Hog1 kinase is a selective transcriptional elongation factor for  
816 genes responding to osmotic stress. *Mol Cell* **23**, 241–250 (2006).

- 817 42. de Nadal, E. & Posas, F. Regulation of gene expression in response to osmotic stress by the yeast  
818 stress-activated protein kinase Hog1. *Topics in Current Genetics* **20**, 81 (2008).
- 819 43. Capaldi, A. P. *et al.* Structure and function of a transcriptional network activated by the MAPK Hog1.  
820 *Nat Genet* **40**, 1300–1306 (2008).
- 821 44. Sharon, E. *et al.* Inferring gene regulatory logic from high-throughput measurements of thousands  
822 of systematically designed promoters. *Nat Biotechnol* **30**, 521–530 (2012).
- 823 45. Proft, M. & Struhl, K. Hog1 kinase converts the Sko1-Cyc8-Tup1 repressor complex into an activator  
824 that recruits SAGA and SWI/SNF in response to osmotic stress. *Mol Cell* **9**, 1307–1317 (2002).
- 825 46. Tantale, K. *et al.* A single-molecule view of transcription reveals convoys of RNA polymerases and  
826 multi-scale bursting. *Nature Communications* **7**, 12248 (2016).
- 827 47. Li, G. & Neuert, G. Multiplex RNA single molecule FISH of inducible mRNAs in single yeast cells.  
828 *Sci Data* **6**, 94 (2019).
- 829 48. Macia, J. *et al.* Dynamic signaling in the Hog1 MAPK pathway relies on high basal signal  
830 transduction. *Science Signaling* **2**, ra13 (2009).
- 831 49. Pokholok, D. K., Zeitlinger, J., Hannett, N. M., Reynolds, D. B. & Young, R. A. Activated signal  
832 transduction kinases frequently occupy target genes. *Science* **313**, 533–536 (2006).
- 833 50. Klopff, E. *et al.* Cooperation between the INO80 complex and histone chaperones determines  
834 adaptation of stress gene transcription in the yeast *Saccharomyces cerevisiae*. *Mol Cell Biol* **29**,  
835 4994–5007 (2009).
- 836 51. Cavigelli, M., Dolfi, F., Claret, F. X. & Karin, M. Induction of c-fos expression through JNK-mediated  
837 TCF/E1k-1 phosphorylation. *The EMBO Journal* **14**, 5957–5964 (1995).
- 838 52. Wood, C. D., Thornton, T. M., Sabio, G., Davis, R. A. & Rincon, M. Nuclear Localization of p38  
839 MAPK in Response to DNA Damage. *Int. J. Biol. Sci.* 428–437 (2009). doi:10.7150/ijbs.5.428
- 840 53. Fowler, T., Sen, R. & Roy, A. L. Regulation of Primary Response Genes. *Molecular Cell* **44**, 348–  
841 360 (2011).
- 842 54. Tullai, J. W. *et al.* Immediate-Early and Delayed Primary Response Genes Are Distinct in Function  
843 and Genomic Architecture. *J. Biol. Chem.* **282**, 23981–23995 (2007).
- 844 55. O'Donnell, A., Odrowaz, Z. A. & Sharrocks, A. D. Immediate-early gene activation by the MAPK  
845 pathways: what do and don't we know? *Biochemical Society transactions* **40**, 58–66 (2012).
- 846 56. Ramirez-Carrozzi, V. R. *et al.* Selective and antagonistic functions of SWI/SNF and Mi-2 $\beta$   
847 nucleosome remodeling complexes during an inflammatory response. *Genes Dev.* **20**, 282–296  
848 (2006).
- 849 57. Wosika, V. *et al.* New families of single integration vectors and gene tagging plasmids for genetic  
850 manipulations in budding yeast. *Molecular Genetics and Genomics* **291**, 2231–2240 (2016).
- 851 58. Goldstein, A. L. & McCusker, J. H. Three new dominant drug resistance cassettes for gene  
852 disruption in *Saccharomyces cerevisiae*. *Yeast* **15**, 1541–1553 (1999).
- 853 59. Sheff, M. A. & Thorn, K. S. Optimized cassettes for fluorescent protein tagging in *Saccharomyces*  
854 *cerevisiae*. *Yeast* **21**, 661–670 (2004).
- 855 60. Pelet, S., Aymoz, D. & Durandau, E. Temporal quantification of MAPK induced expression in single  
856 yeast cells. *J Vis Exp* (2013). doi:10.3791/50637
- 857 61. Edelstein, A., Amodaj, N., Hoover, K., Vale, R. & Stuurman, N. Computer control of microscopes  
858 using  $\mu$ Manager. *Curr Protoc Mol Biol* **Chapter 14**, Unit14.20 (2010).
- 859 62. Unger, M., Lee, S.-S., Peter, M. & Koeppl, H. Pulse Width Modulation of Liquid Flows: Towards  
860 Dynamic Control of Cell Microenvironments. in *15th International Conference on miniaturized*  
861 *systems for chemistry and life sciences: Microtas 2011* 1567–1569 (Chemical and Biological  
862 Microsystems Society, 2011).
- 863 63. Unger, M. P. Interrogating the single cell: computational and experimental methods for optimal live  
864 cell experiments. (ETH Zurich, 2014). doi:10.3929/ethz-a-010350761
- 865

A

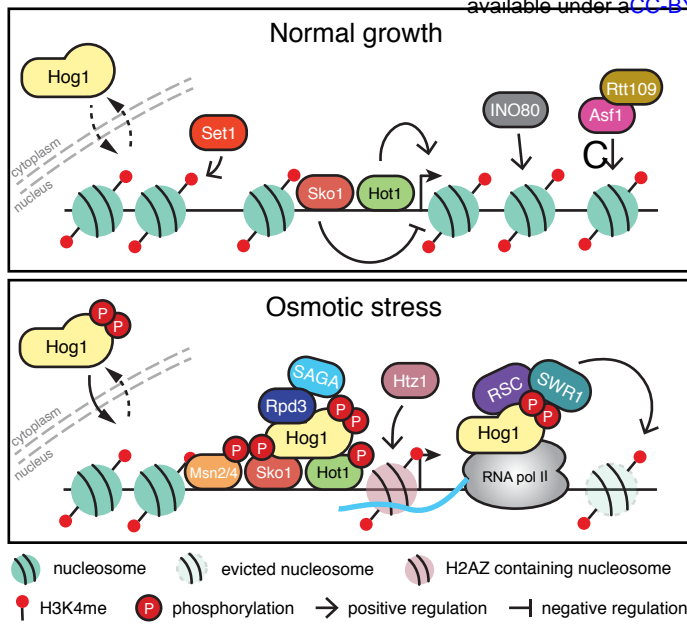

B

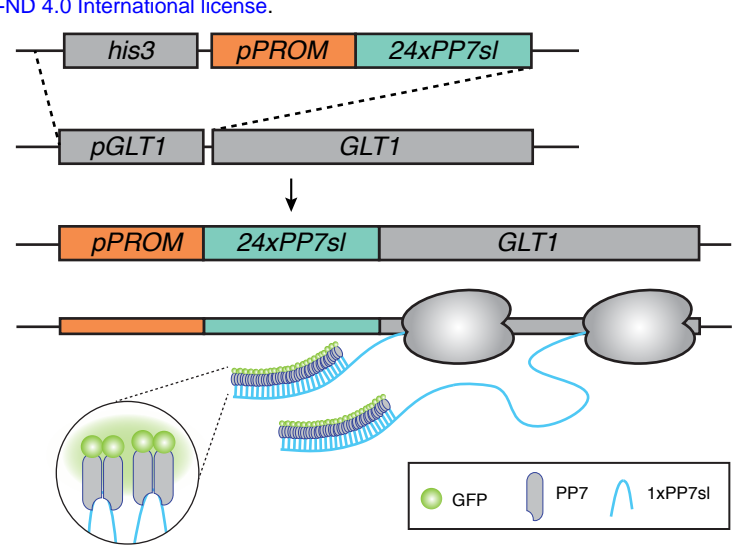

C

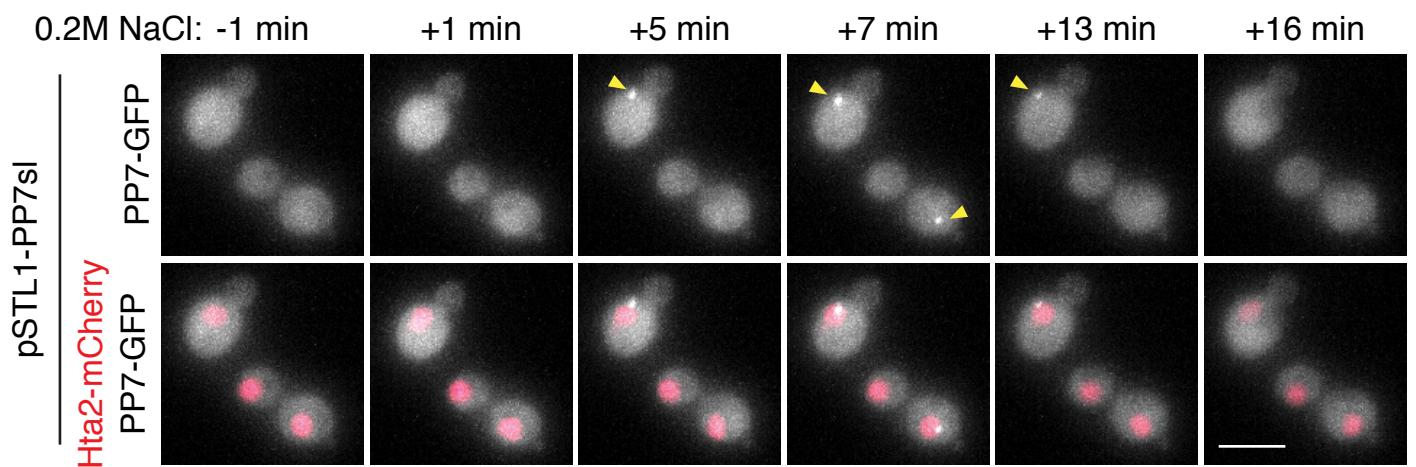

D

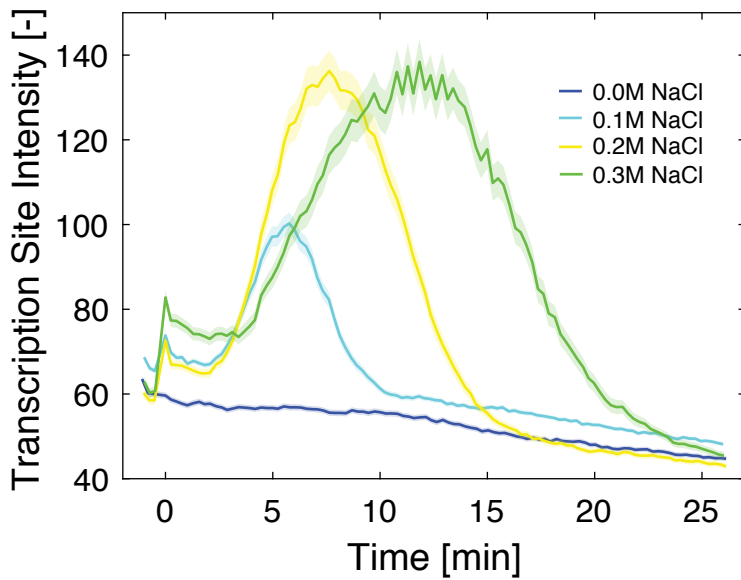

E

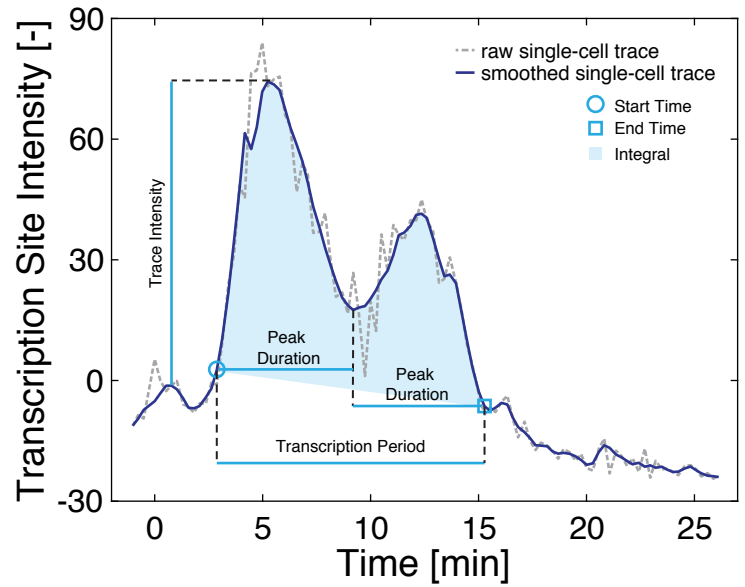

Figure 1

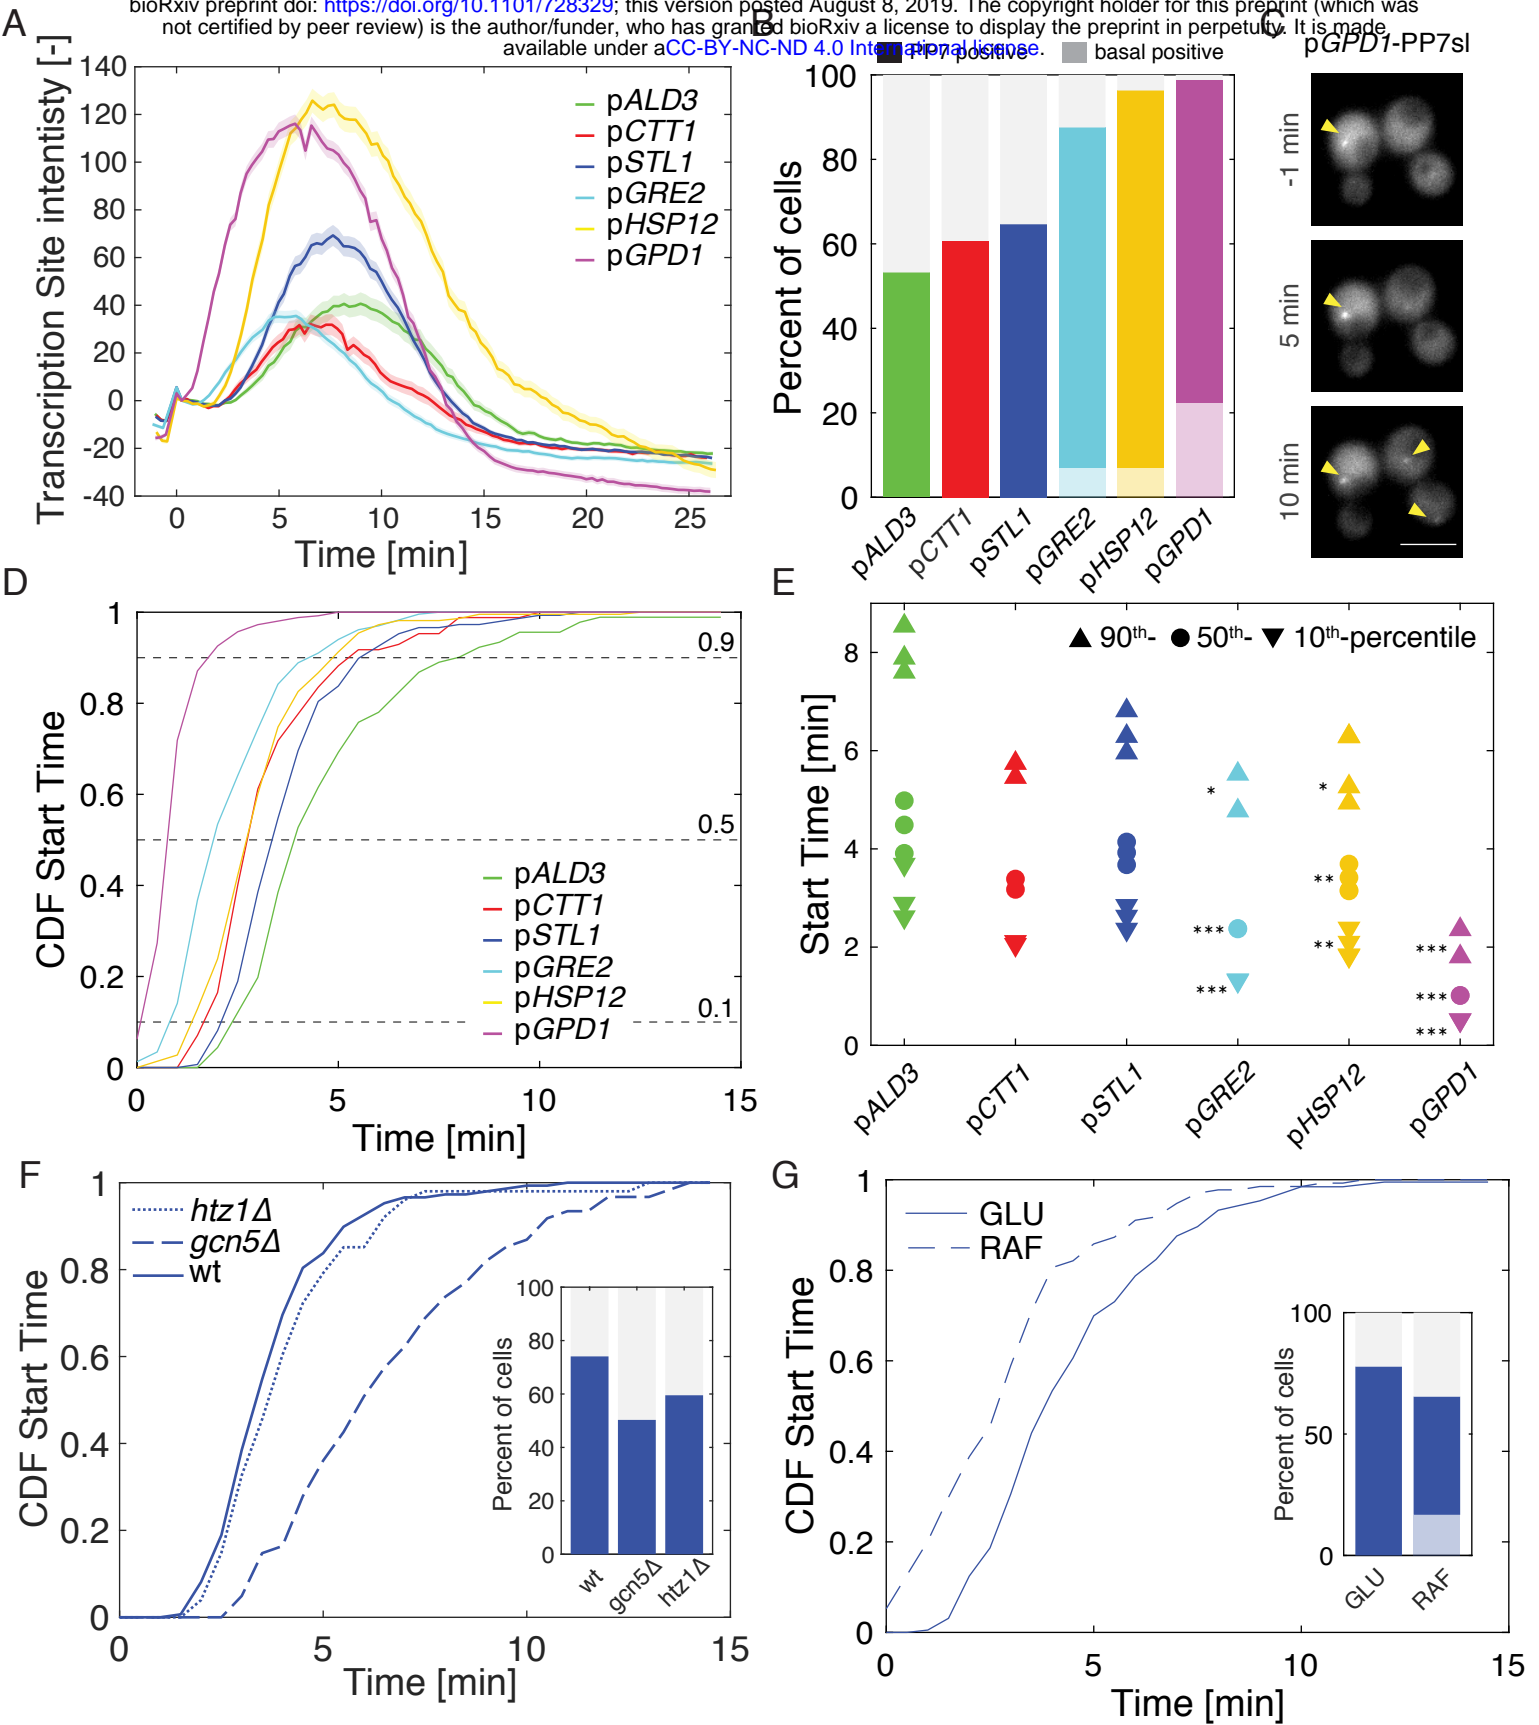

Figure 2

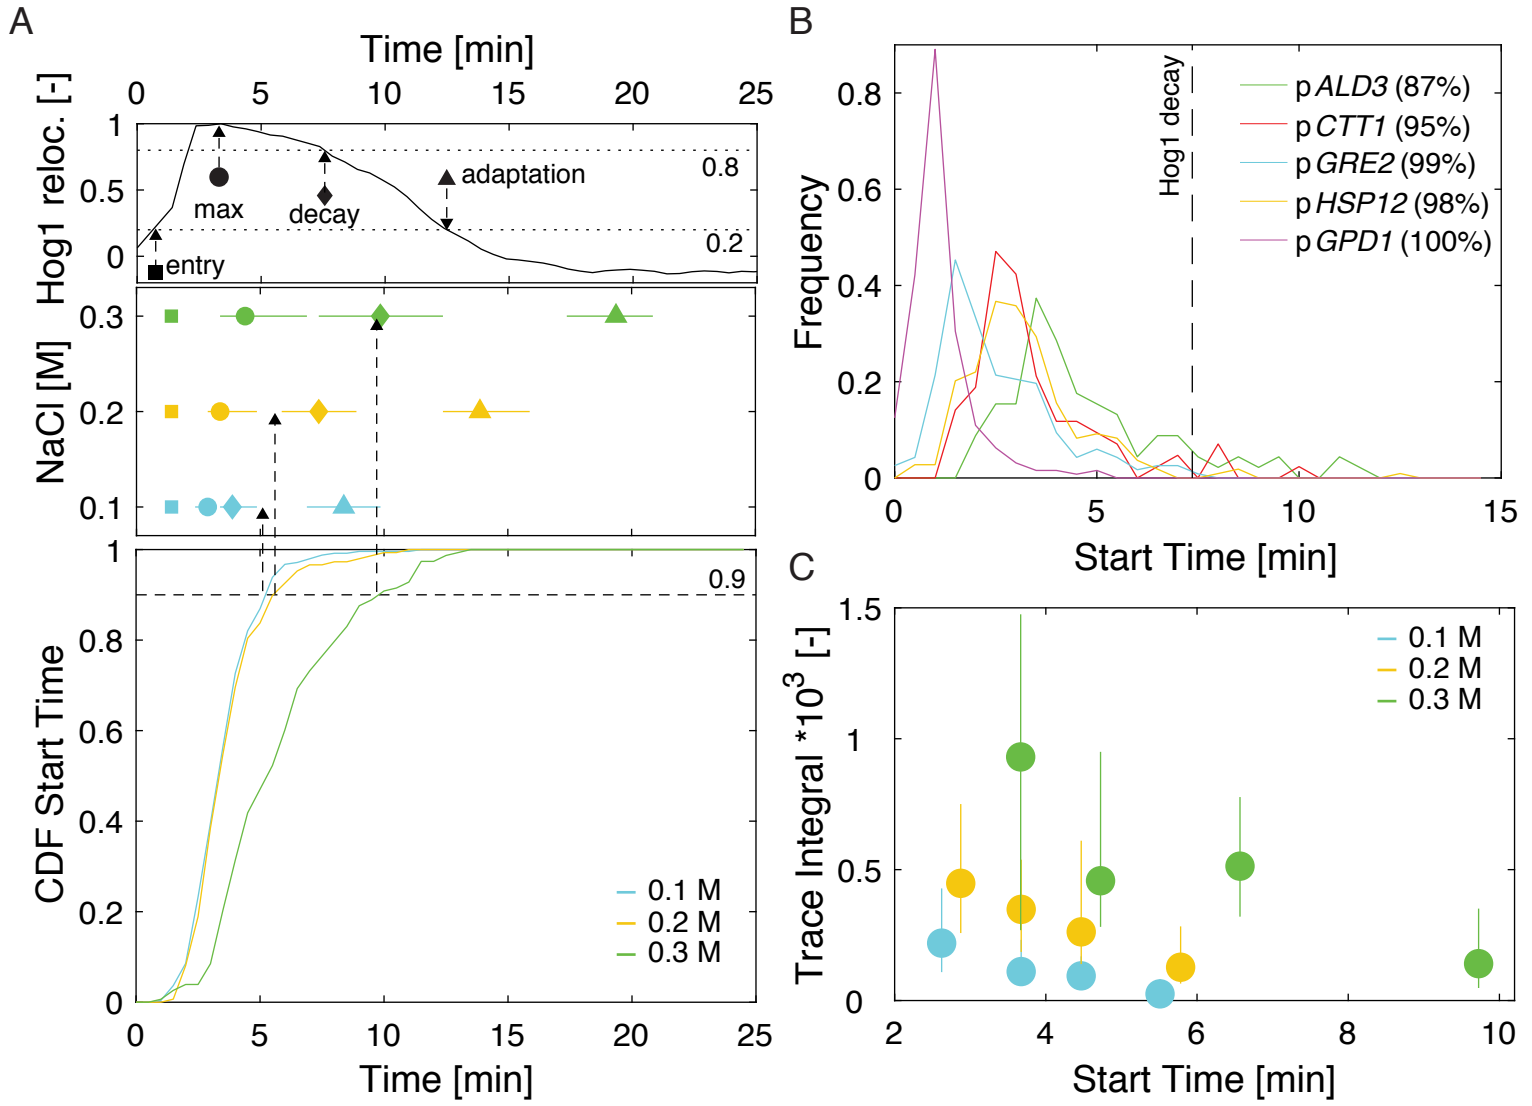

Figure 3

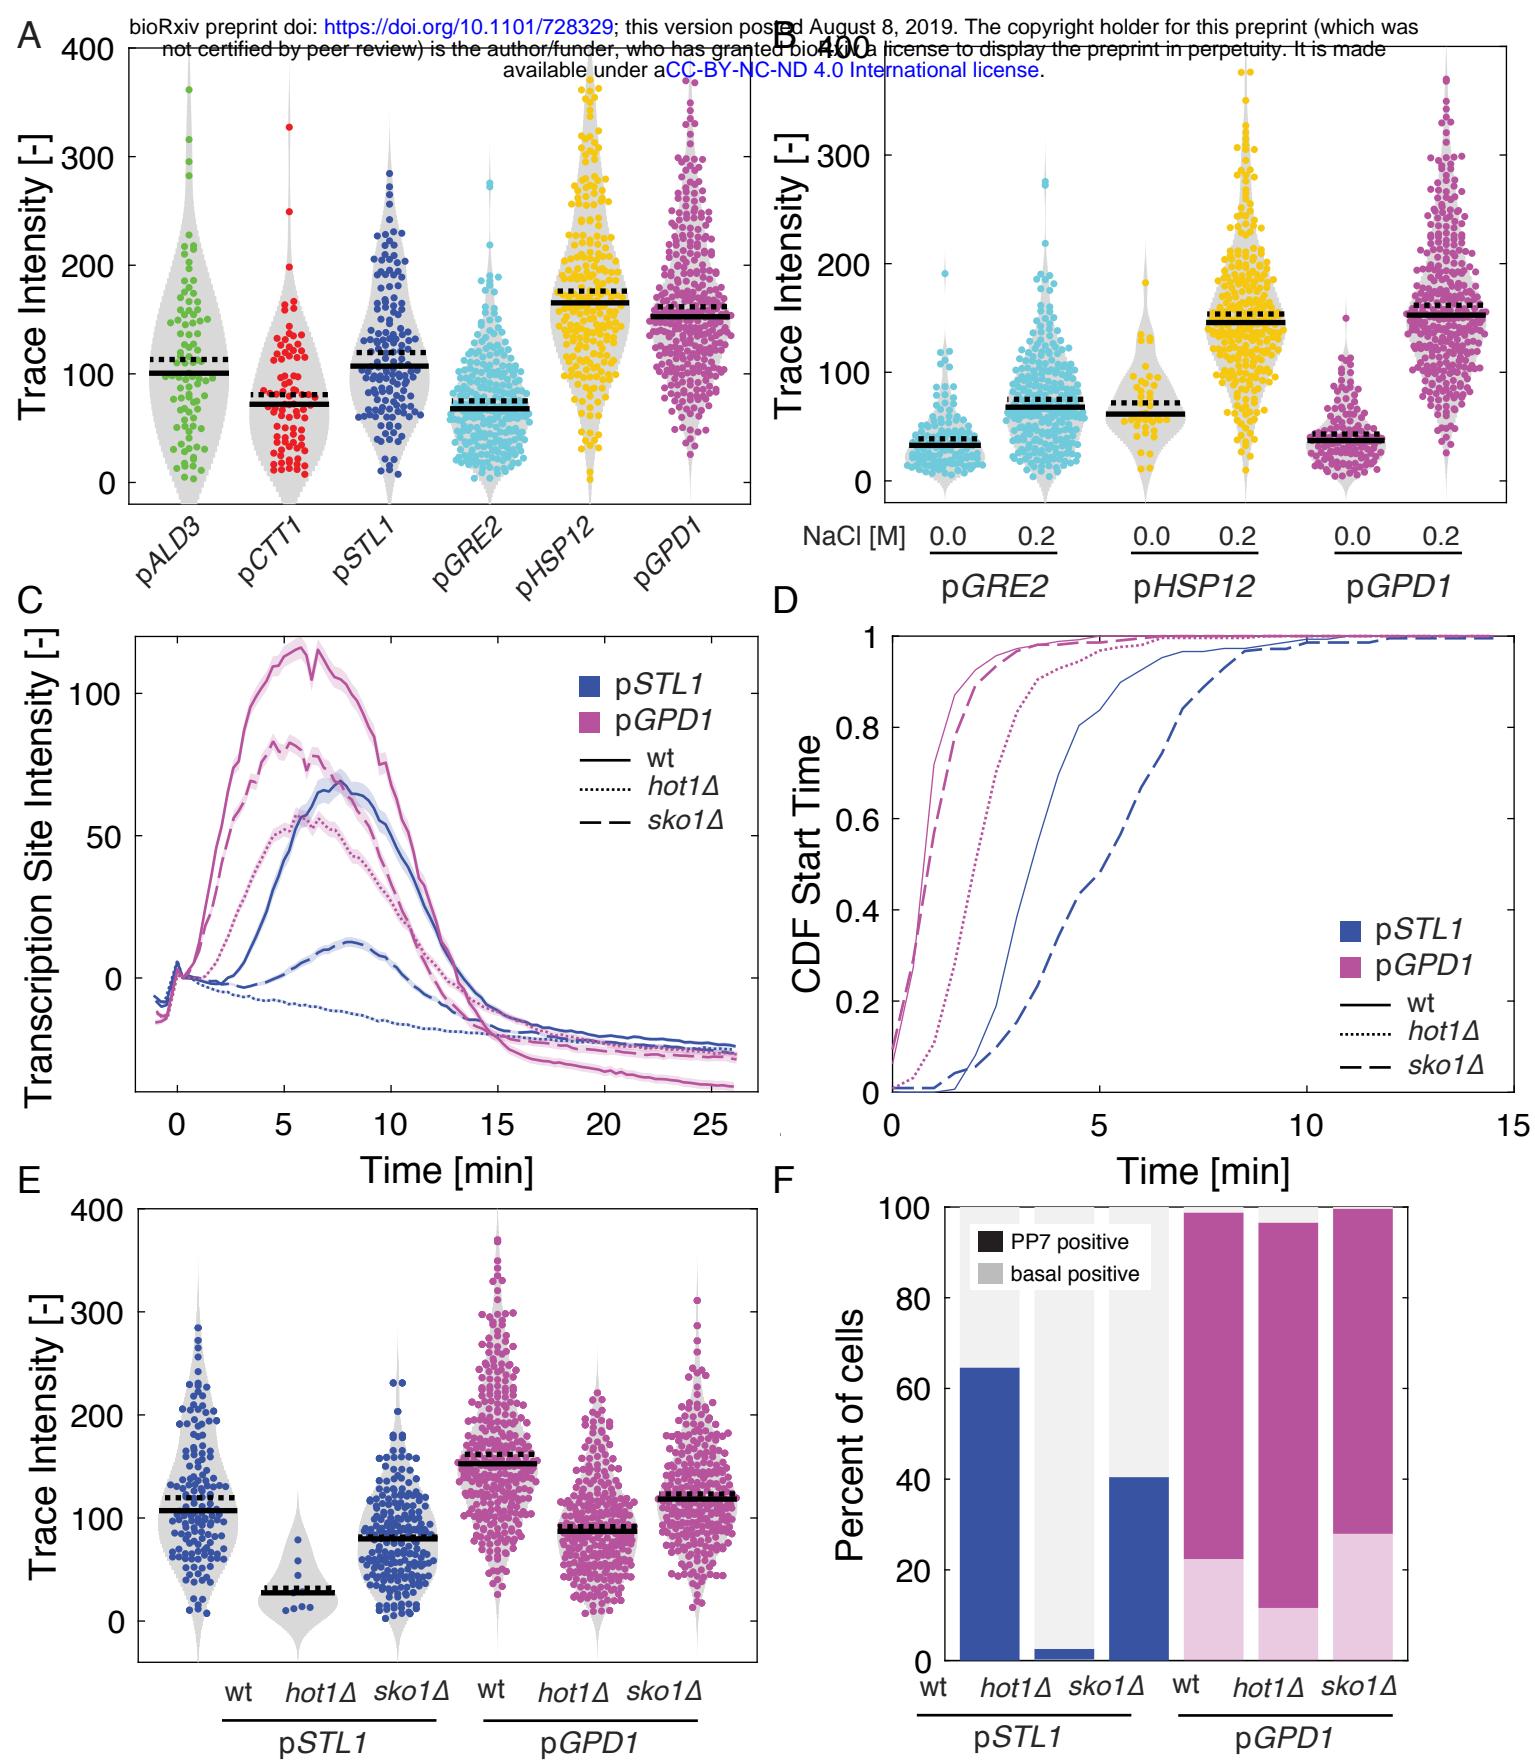

Figure 4

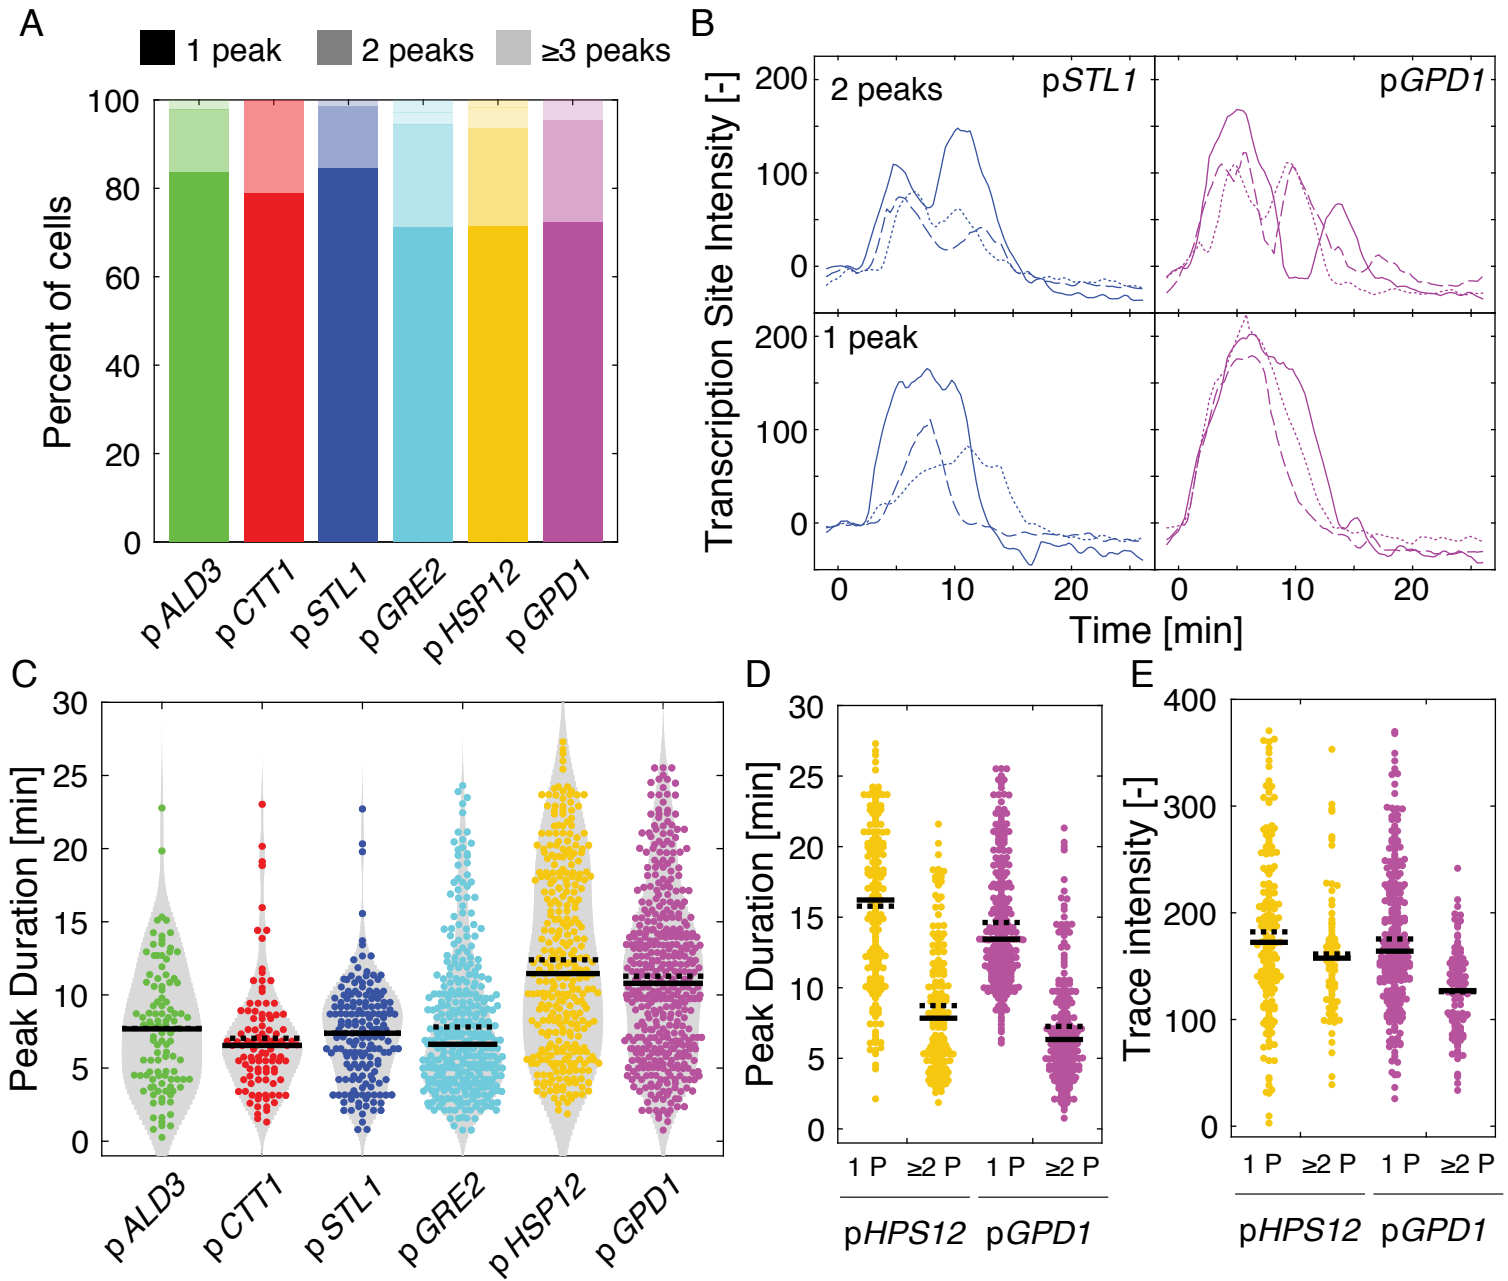

Figure 5



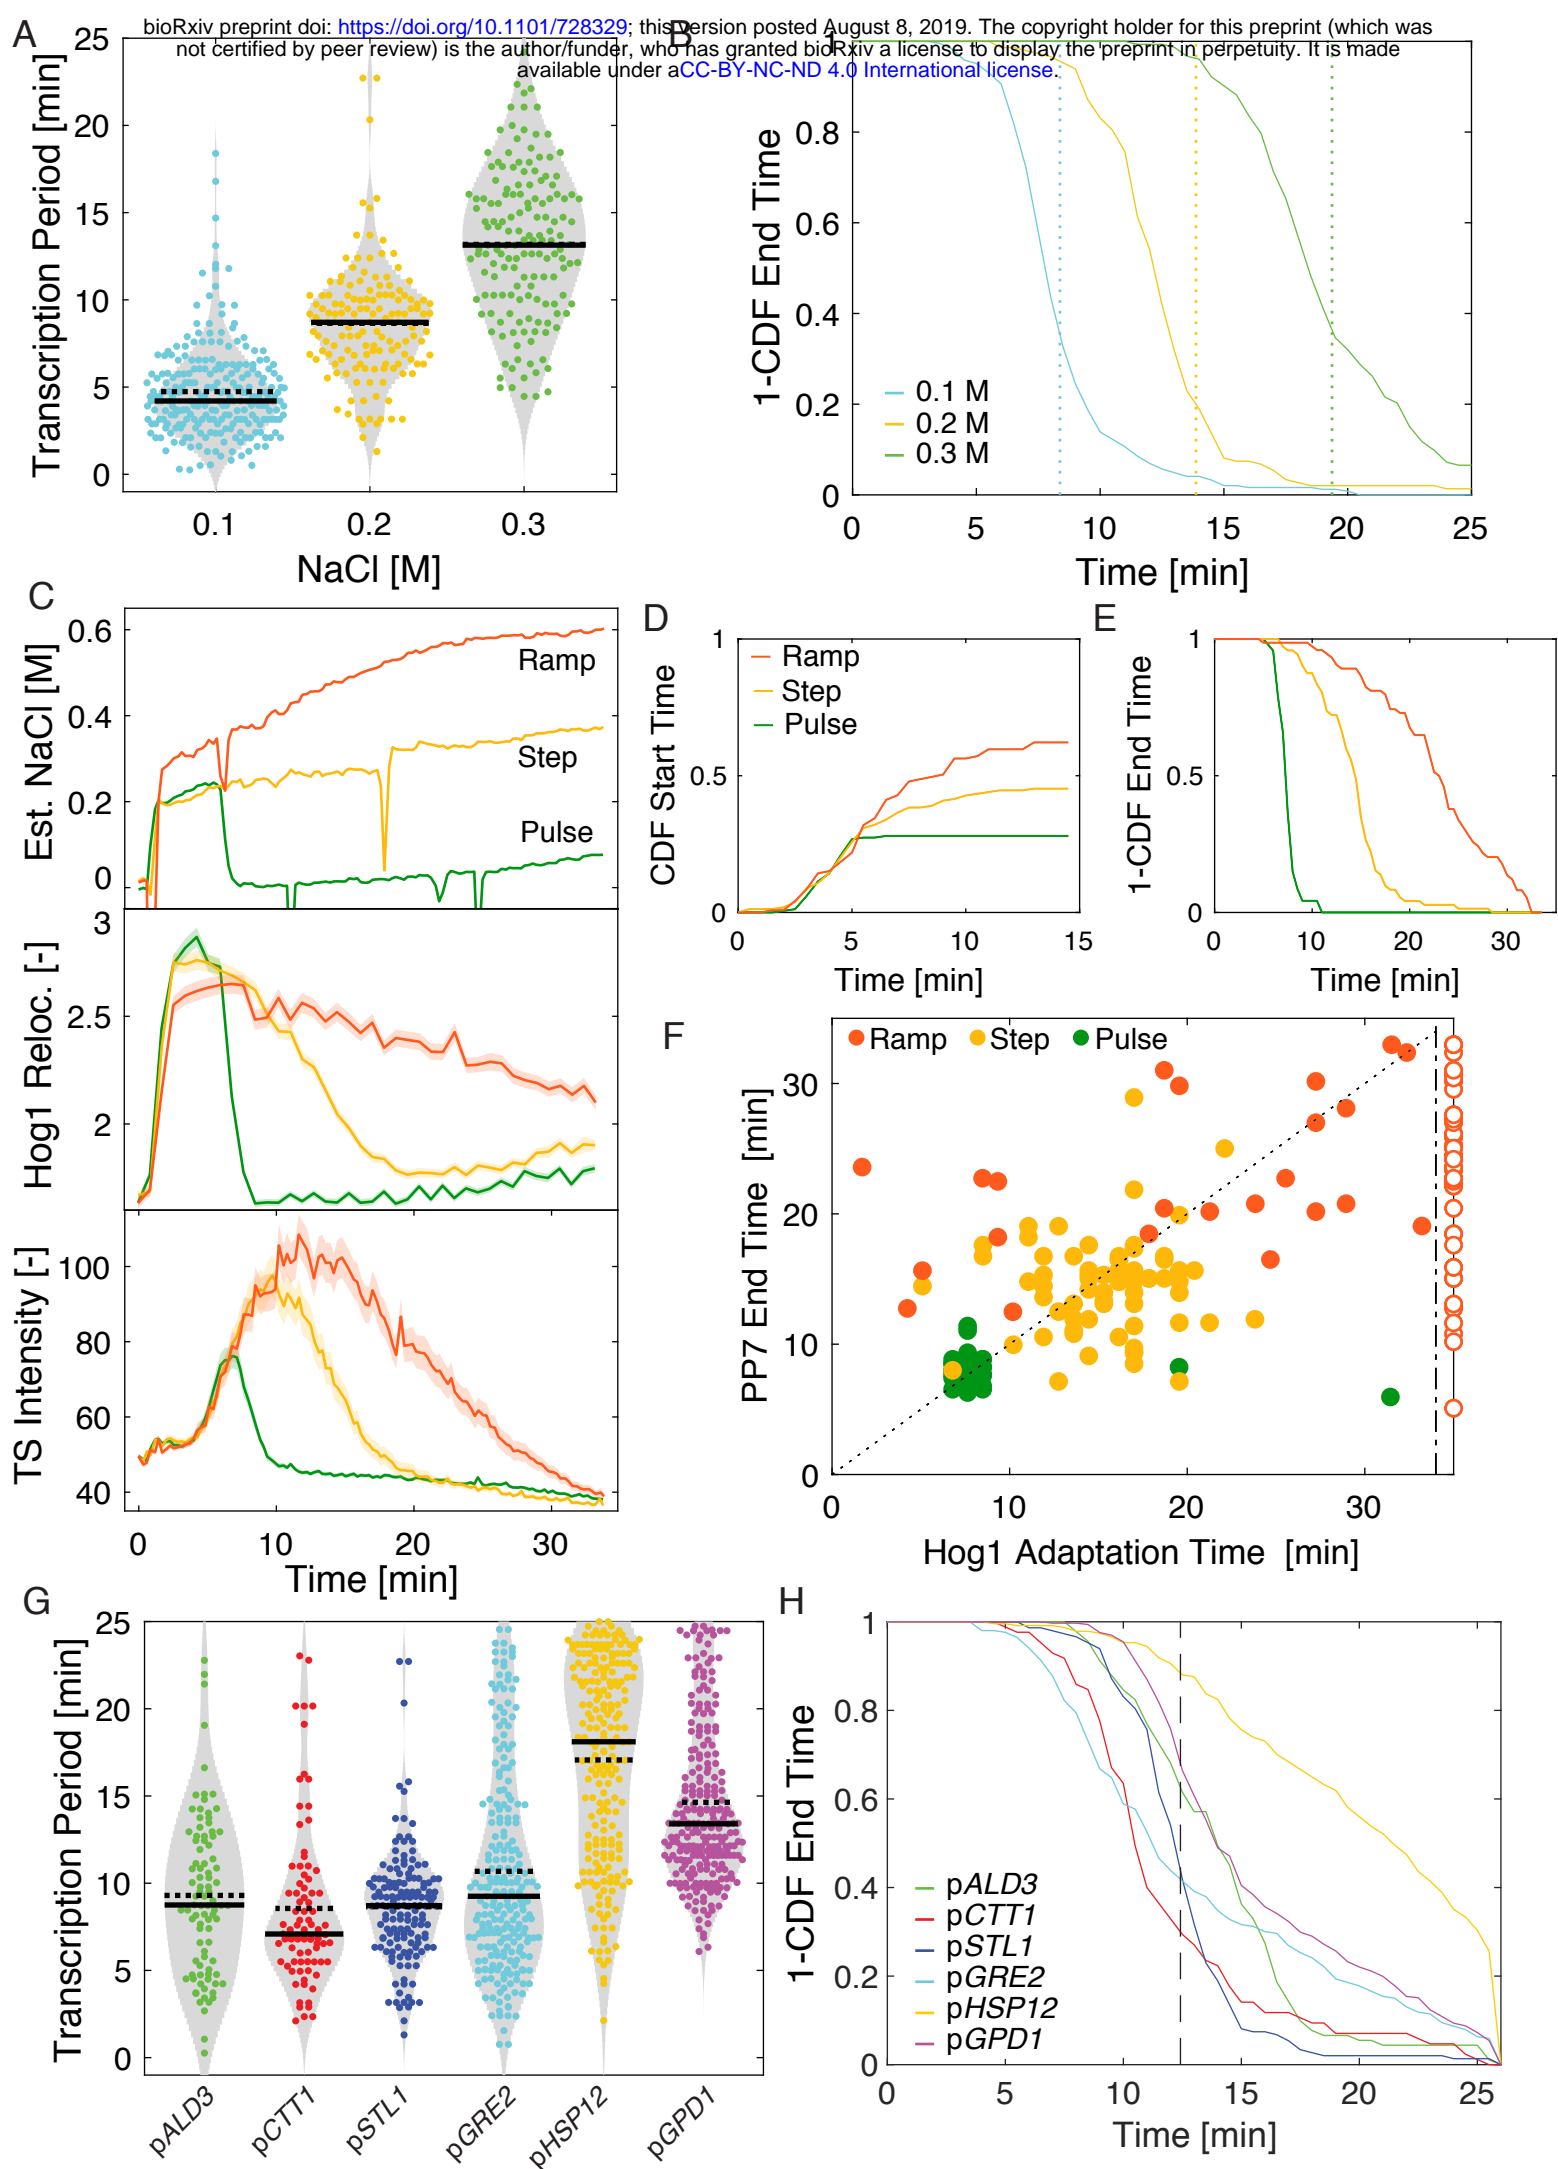

Figure 6
